# Supplementary material for: Nickel(ii) complexes based on dithiolate–polyamine binary ligand systems: crystal structures, hirshfeld surface analysis, theoretical study, and catalytic activity study on photocatalytic hydrogen generation
Source: Royal Society of Chemistry journal article supplement (doi:10.1039/d1dt00352f), 2021-01-01
Supplement: d1dt00352f1.pdf [file d1dt00352f1.pdf]

## Supporting Information

### **Nickel(II) Complexes Based on Dithiolate-Polyamine Binary Ligand Systems: Crystal structures, Hirshfeld surface analysis, Theoretical Study, and Catalytic Activity Study in Photocatalytic Hydrogen Generation**

Suman Adhikari,<sup>\*a</sup> Tirtha Bhattacharjee,<sup>b</sup> Sharmila Bhattacharjee<sup>a</sup>, Constantin Gabriel Daniliuc,<sup>c</sup> Antonio Frontera<sup>d\*</sup>, Eric M. Lopato<sup>e</sup>, Stefan Bernhard<sup>\*e</sup>

<sup>a</sup>*Department of Chemistry, Govt. Degree College, Dharmanagar, Tripura (N)-799253, India*

<sup>b</sup>*Department of Chemistry, Bineswar Brahma Engineering College, Kokrajhar-783370, Assam, India*

<sup>c</sup>*Organisch-Chemisches Institut, Westfälische Wilhelms-Universität Münster, Corrensstraße 40, D-48149, Münster, Germany,*

<sup>d</sup>*Department de Química, Universitat de les Illes Balears, Crta. de Valldemossa km 7.5, 07122 Palma de Mallorca (Balears), Spain*

<sup>e</sup>*Department of Chemistry, Carnegie Mellon University, 4400 Fifth Avenue, Pittsburgh, Pennsylvania 15213, United States*

*E-mail addresses: [sumanadhi@gmail.com](mailto:sumanadhi@gmail.com) (S. Adhikari); [toni.frontera@uib.es](mailto:toni.frontera@uib.es) (A. Frontera)*

## Table of Contents:

1. X-ray crystal structure analysis of **1**.
2. X-ray crystal structure analysis of **2**.
3. X-ray crystal structure analysis of **3**.
4. **Figure S1**. FT-IR spectrum of complex **1**.
5. **Figure S2**. FT-IR spectrum of complex **2**.
6. **Figure S3**. FT-IR spectrum of complex **3**.
7. **Figure S4**.  $^1\text{H}$  NMR Spectrum of complex **1** in  $\text{dms}\text{-}d_6$ .
8. **Figure S5**.  $^1\text{H}$  NMR Spectrum of complex **2** in  $\text{dms}\text{-}d_6$ .
9. **Figure S6**.  $^1\text{H}$  NMR Spectrum of complex **3** in  $\text{dms}\text{-}d_6$ .
10. **Figure S7**. UV-Vis spectra of complex **1** ( $1 \times 10^{-4}$  M) in 4% DMSO in  $\text{CHCl}_3$ .
11. **Figure S8**. UV-Vis spectra of complex **2** ( $1 \times 10^{-4}$  M) in 4% DMSO in  $\text{CHCl}_3$ .
12. **Figure S9**. UV-Vis spectra of complex **3** ( $1 \times 10^{-4}$  M) in 4% DMSO in  $\text{CHCl}_3$ .
13. **Figure S10**. Partial view of 3D supramolecular framework of **1**.
14. **Figure S11**. Partial view of hydrogen bonds in **2**.
15. **Figure S12**. 3D architecture showing circular ribbon like stacking assembly.
16. **Figure S13**. Hirshfeld surfaces mapped with shape index and curvedness for **1-3**.
17. **Figure S14**. 2D fingerprint plots with  $d_i$  vs  $d_e$  for **1**, **2B** and **3B** showing N...H/H...N, S...H/H...S, C...H/H...C, H...H and H...O interactions (from left to right).
18. **Figure S15**. 2D fingerprint plots with  $d_i$  vs  $d_e$  for **2A** and **3A** showing S...H, N...H, and C...H interactions.
19. **Figure S16**. Views of Hirshfeld surfaces for nickel center in **1-3** mapped over shape index ( $s$ ) in the range  $-1.0 \text{ \AA}$  to  $1.0 \text{ \AA}$  and curvedness ( $c$ ) in the range  $-4.0 \text{ \AA}$  to  $0.4 \text{ \AA}$ .
20. **Figure S17**. C-H...Ni interaction between  $[\text{Ni}(i\text{-mnt})_2]^{2-}$  and  $[\text{Ni}(deta)_2]^{+2}$ .
21. **Table S1**: Bond lengths ( $\text{\AA}$ ) for **1-3**.
22. **Table S2**: Bond angles ( $^\circ$ ) of **1-3**.
23. **Table S3**: Torsion angles ( $^\circ$ ) of **1-3**.
24. **Table S4**: Summary of hydrogen bond parameters in **1-3**.

**X-ray crystal structure analysis of 1:** A pale yellow plate-like specimen of  $C_{12}H_{24}N_6NiOS_3$ , approximate dimensions 0.020 mm x 0.060 mm x 0.080 mm, was used for the X-ray crystallographic analysis. The X-ray intensity data were measured. The integration of the data using a monoclinic unit cell yielded a total of 8391 reflections to a maximum  $\theta$  angle of  $28.20^\circ$  (0.75 Å resolution), of which 4553 were independent (average redundancy 1.843, completeness = 98.4%,  $R_{int} = 3.12\%$ ,  $R_{sig} = 3.59\%$ ) and 3985 (87.52%) were greater than  $2\sigma(F^2)$ . The final cell constants of  $a = 8.3663(2)$  Å,  $b = 14.6831(3)$  Å,  $c = 15.5009(4)$  Å,  $\beta = 99.3820(10)^\circ$ , volume =  $1878.71(8)$  Å<sup>3</sup>, are based upon the refinement of the XYZ-centroids of reflections above  $20 \sigma(I)$ . Data were corrected for absorption effects using the multi-scan method (SADABS). The calculated minimum and maximum transmission coefficients (based on crystal size) are 0.8980 and 0.9730. The structure was solved and refined using the Bruker SHELXTL Software Package, using the space group  $P2_1/n$ , with  $Z = 4$  for the formula unit,  $C_{12}H_{24}N_6NiOS_3$ . The final anisotropic full-matrix least-squares refinement on  $F^2$  with 257 variables converged at  $R1 = 3.83\%$ , for the observed data and  $wR2 = 9.63\%$  for all data. The goodness-of-fit was 1.053. The largest peak in the final difference electron density synthesis was  $0.403 e/\text{Å}^3$  and the largest hole was  $-0.729 e/\text{Å}^3$  with an RMS deviation of  $0.079 e/\text{Å}^3$ . On the basis of the final model, the calculated density was  $1.496 \text{ g/cm}^3$  and  $F(000)$ , 888 e. The hydrogens at N3, N5 and N6 atoms were refined freely. CCDC number: 2054290.

**X-ray crystal structure analysis of 2:** A dark orange plate-like specimen of  $C_{16}H_{26}N_{10}Ni_2S_4$ , approximate dimensions 0.020 mm x 0.030 mm x 0.060 mm, was used for the X-ray crystallographic analysis. The X-ray intensity data were measured. The integration of the data using a monoclinic unit cell yielded a total of 5608 reflections to a maximum  $\theta$  angle of  $28.17^\circ$  (0.75 Å resolution), of which 2999 were independent (average redundancy 1.870, completeness = 99.3%,  $R_{int} = 5.12\%$ ,  $R_{sig} = 5.68\%$ ) and 2344 (78.16%) were greater than  $2\sigma(F^2)$ . The final cell constants of  $a = 16.3199(6)$  Å,  $b = 9.1021(3)$  Å,  $c = 18.1332(7)$  Å,  $\beta = 114.143(3)^\circ$ , volume =  $2457.99(16)$  Å<sup>3</sup>, are based upon the refinement of the XYZ-centroids of reflections above  $20 \sigma(I)$ . Data were corrected for absorption effects using the multi-scan method (SADABS). The calculated minimum and maximum transmission coefficients (based on crystal size) are 0.8950 and 0.9630. The structure was solved and refined using the Bruker SHELXTL Software Package, using the space group  $C2/c$ , with  $Z = 4$  for the formula unit,  $C_{16}H_{26}N_{10}Ni_2S_4$ . The final anisotropic full-matrix least-squares refinement on  $F^2$  with 167 variables converged at  $R1 = 4.95\%$ , for the observed data and  $wR2 = 11.48\%$  for all data. The goodness-of-fit was 1.025. The largest peak in the final difference electron density synthesis was  $0.438 e/\text{Å}^3$  and the largest hole was  $-0.430 e/\text{Å}^3$  with an RMS deviation of  $0.105 e/\text{Å}^3$ . On the basis of the final model, the calculated density was  $1.633 \text{ g/cm}^3$  and  $F(000)$ , 1248  $e^-$ . The hydrogen atoms at N3, N4 and N5 were refined freely. CCDC number: 2054291.

**X-ray crystal structure analysis of 3:** A dark orange prism-like specimen of  $C_{26}H_{30}N_{10}Ni_2O_2S_4$ , approximate dimensions 0.020 mm x 0.060 mm x 0.090 mm, was used for the X-ray crystallographic analysis. The X-ray intensity data were measured. The integration of the data using a monoclinic unit cell yielded a total of 3885 reflections to a maximum  $\theta$  angle of  $28.20^\circ$  (0.75 Å resolution), of which 2226 were independent (average redundancy 1.745, completeness = 98.8%,  $R_{int} = 3.38\%$ ,  $R_{sig} = 3.65\%$ ) and 1856 (83.38%) were greater than  $2\sigma(F^2)$ . The final cell constants of  $\underline{a} = 18.658(4)$  Å,  $\underline{b} = 7.2167(14)$  Å,  $\underline{c} = 14.534(3)$  Å,  $\beta = 120.13(3)^\circ$ , volume =  $1692.6(7)$  Å<sup>3</sup>, are based upon the refinement of the XYZ-centroids of reflections above  $20 \sigma(I)$ . Data were corrected for absorption effects using the multi-scan method (SADABS). The calculated minimum and maximum transmission coefficients (based on crystal size) are 0.8840 and 0.9730. The structure was solved and refined using the Bruker SHELXTL Software Package, using the space group  $C2/m$ , with  $Z = 2$  for the formula unit,  $C_{26}H_{30}N_{10}Ni_2O_2S_4$ . The final anisotropic full-matrix least-squares refinement on  $F^2$  with 150 variables converged at  $R1 = 4.64\%$ , for the observed data and  $wR2 = 12.61\%$  for all data. The goodness-of-fit was 1.046. The largest peak in the final difference electron density synthesis was  $0.626 e/\text{Å}^3$  and the largest hole was  $-0.439 e/\text{Å}^3$  with an RMS deviation of  $0.077 e/\text{Å}^3$ . On the basis of the final model, the calculated density was  $1.492 \text{ g/cm}^3$  and  $F(000)$ , 784  $e^-$ . The hydrogen atoms at N3 were refined freely, but with N-H distance restraints (DFIX, SADI). CCDC number: 2054292.

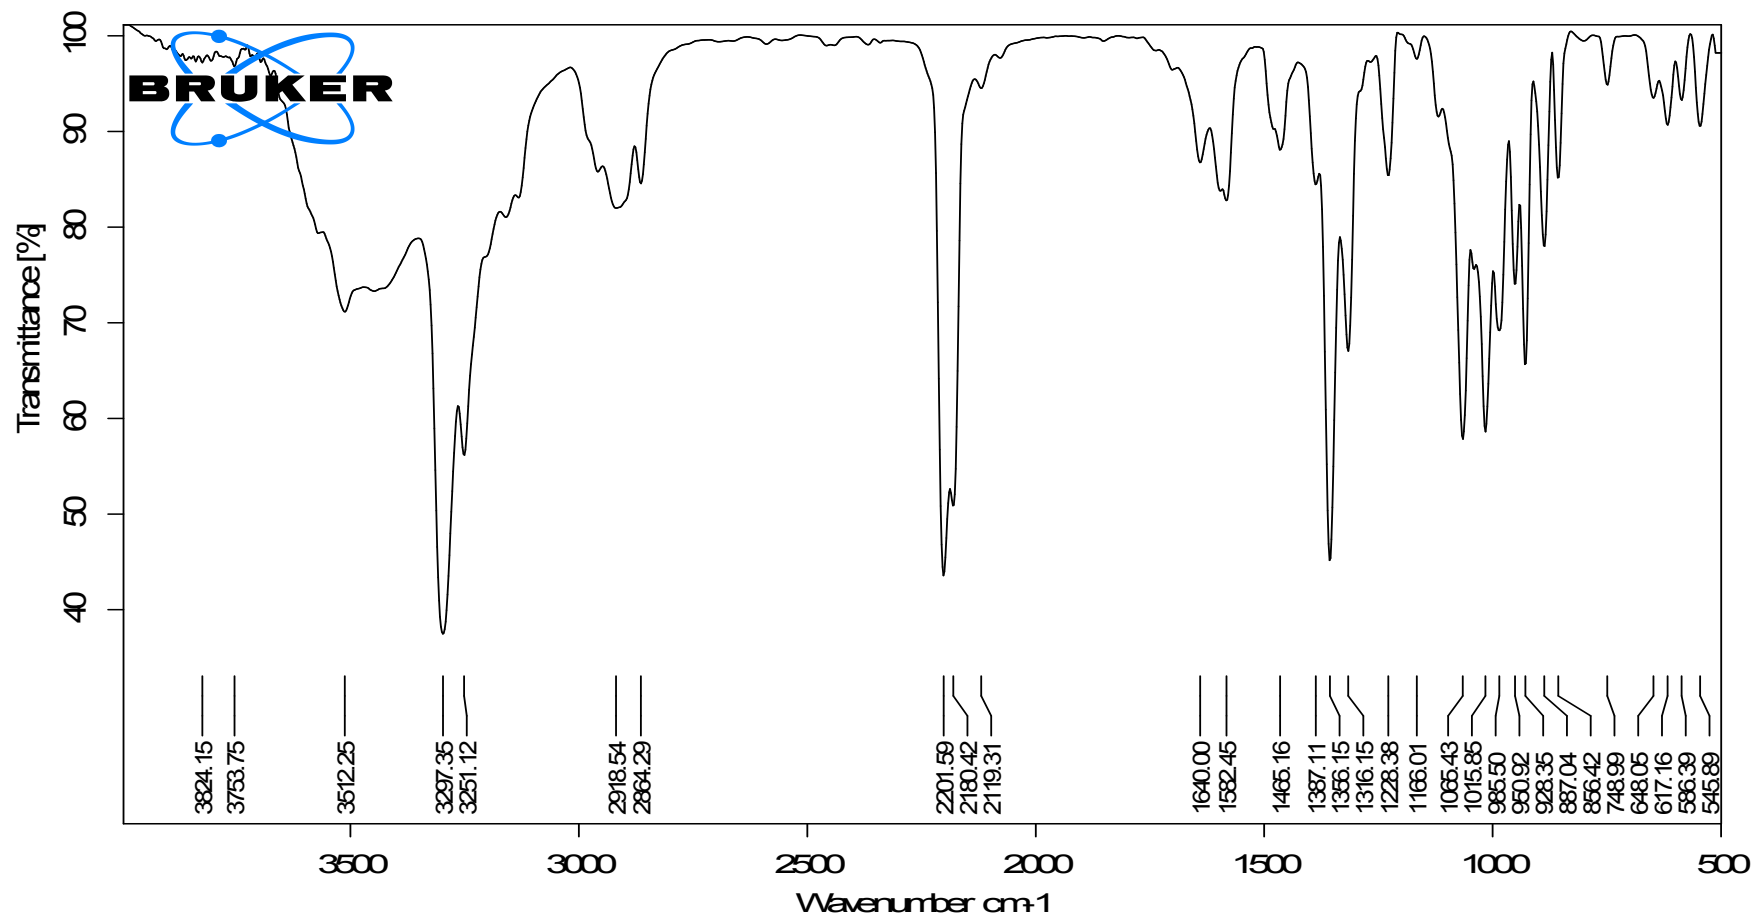

Figure S1. FT-IR spectrum of  $[Ni(tetraen)(i-mnt)](DMSO)$

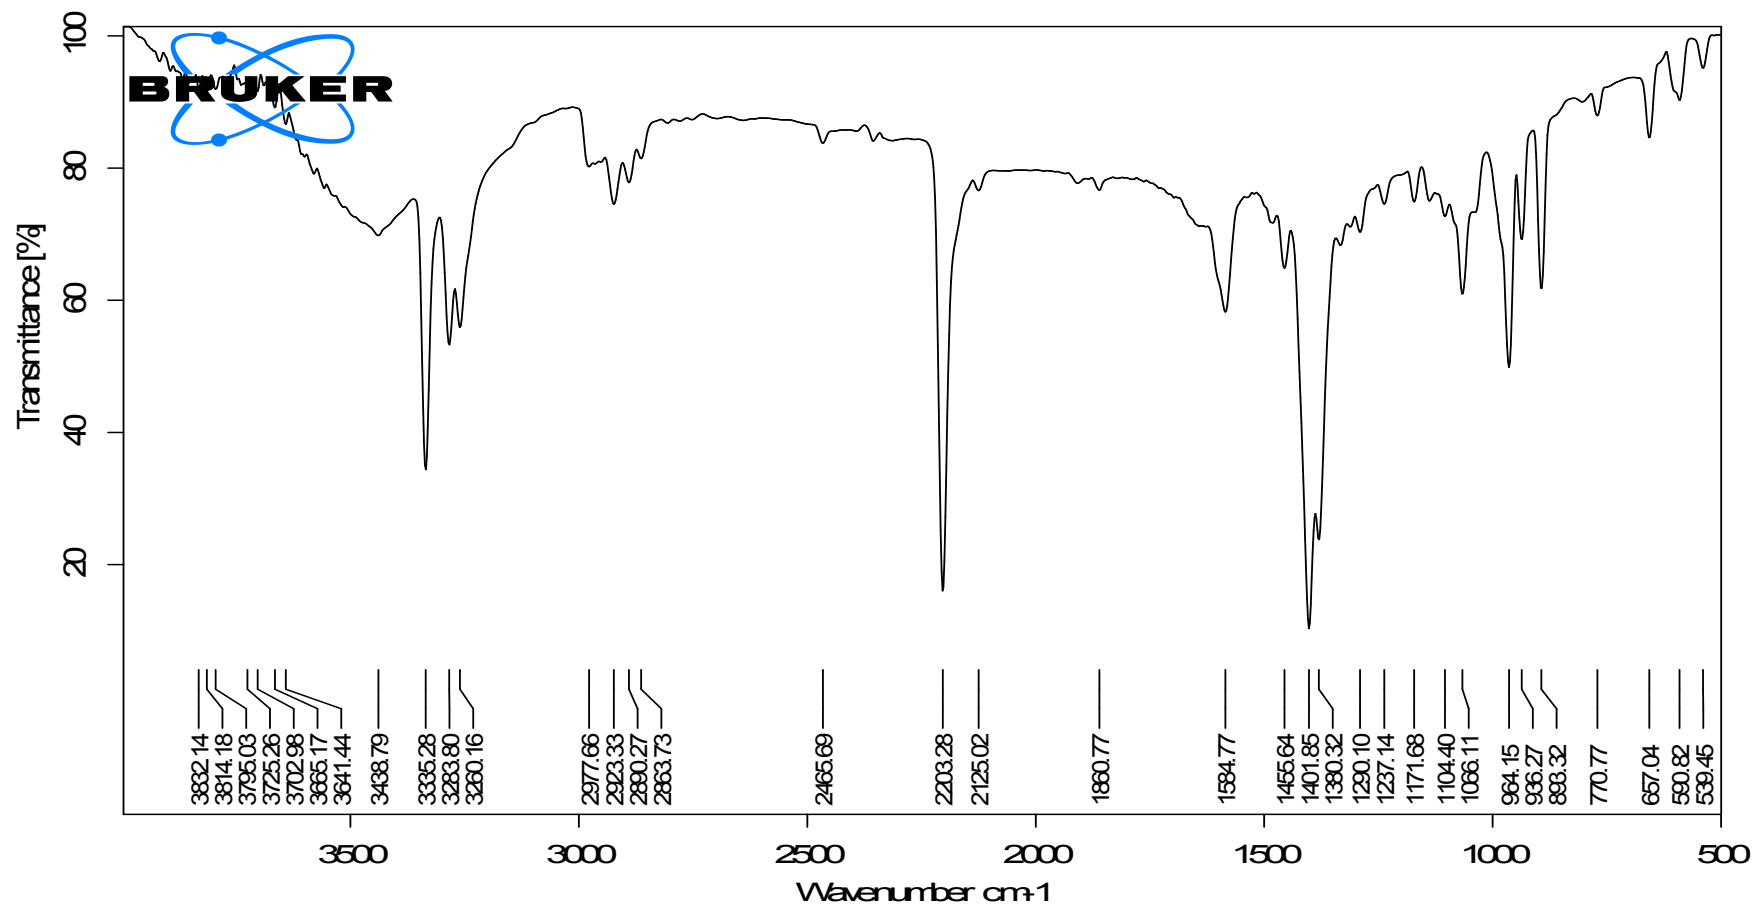

Figure S2. FT-IR spectrum of  $[Ni_2(tren)_2(i-mnt)_2]$

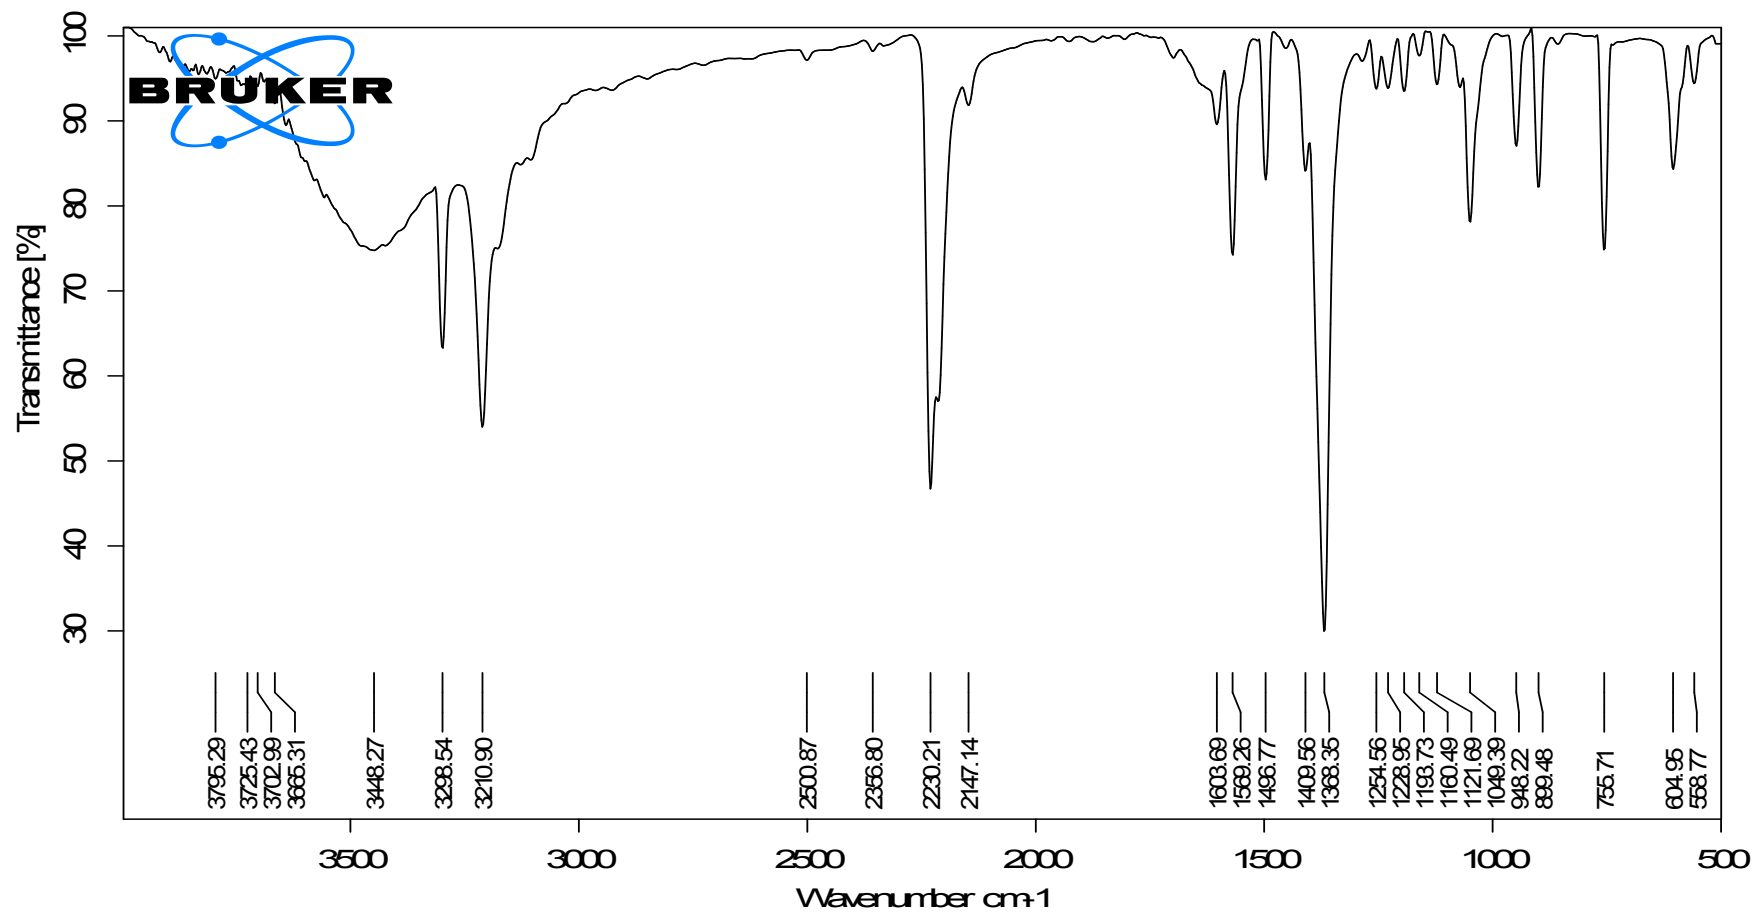

Figure S3. FT-IR spectrum of  $[Ni_2(i-mnt)_2(opda)_2]_n$



1H SA-SB-3  
1H SA-SB-3,DMSOd6, 21/05/19, SAIF, NEHU

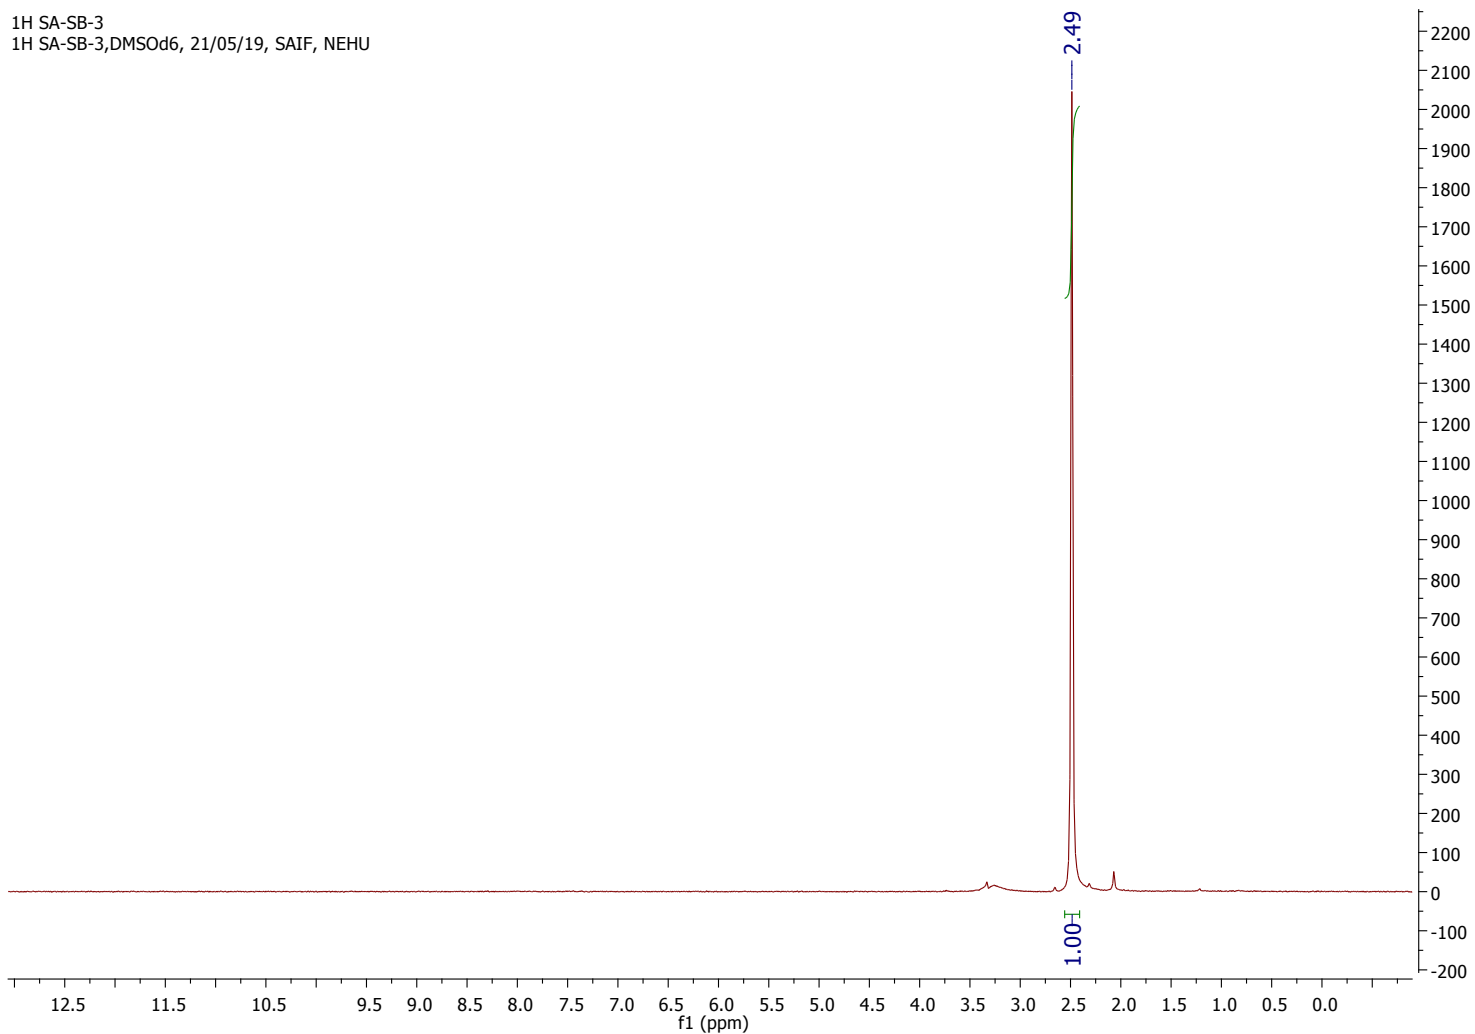

**Figure S4.** <sup>1</sup>H NMR Spectrum of complex **1** in dmsO-*d*<sub>6</sub>

1H SA-SB-2  
1H SA-SB-2,DMSOd6, 25/06/2019, SAIF, NEHU

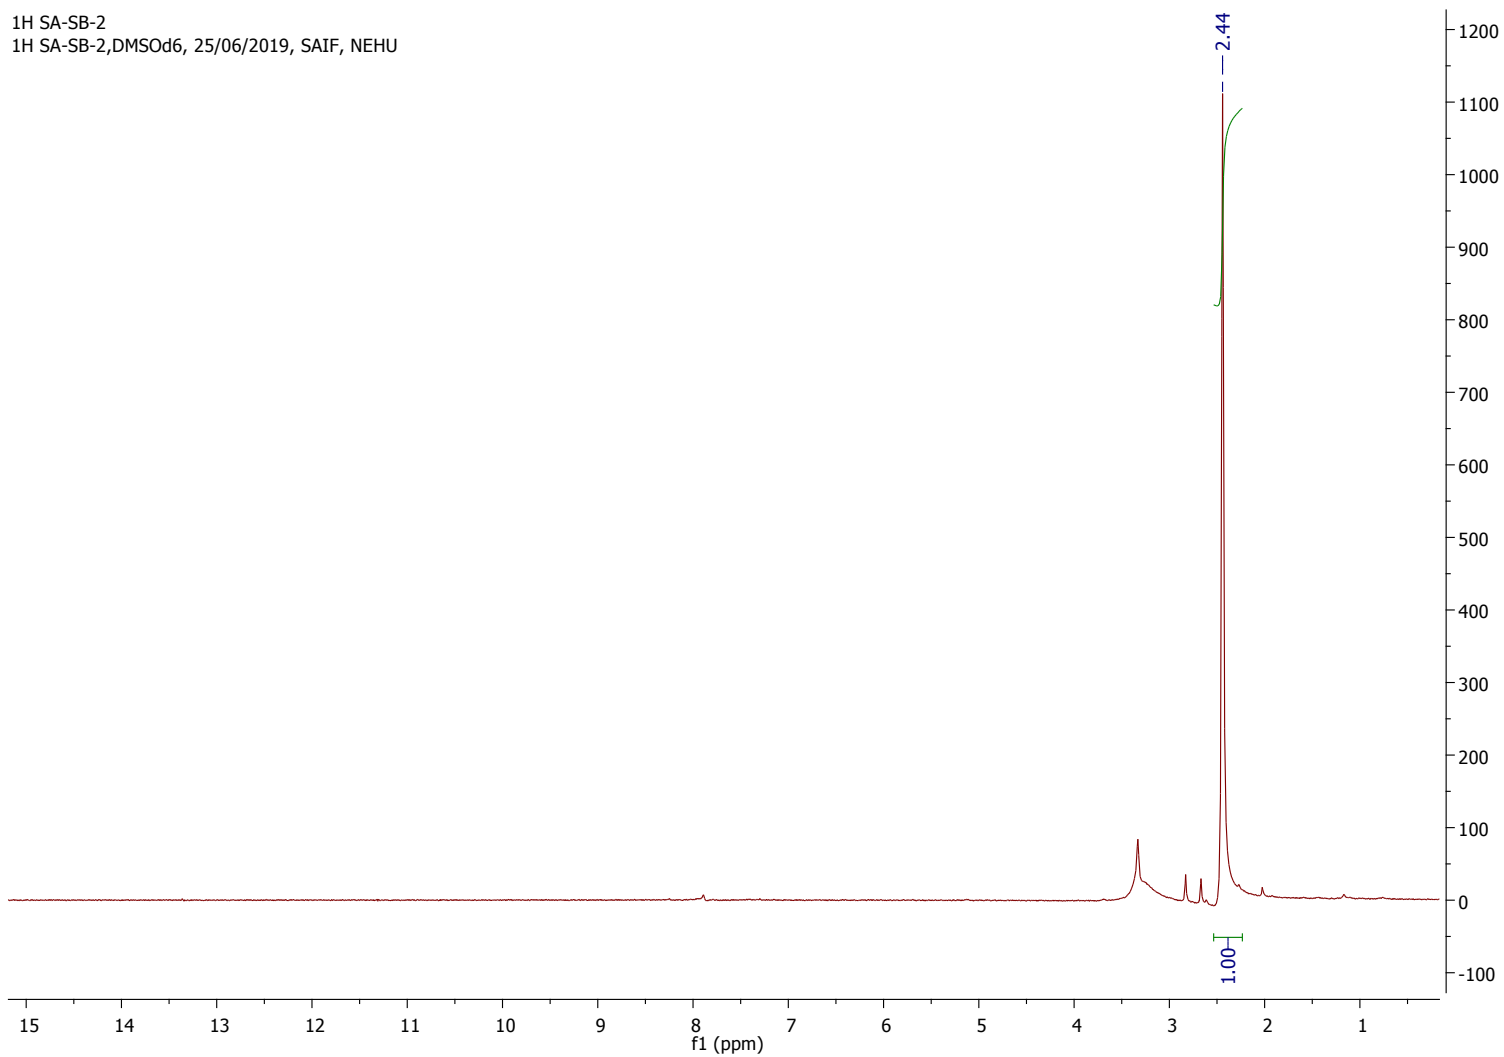

**Figure S5.** <sup>1</sup>H NMR Spectrum of complex **2** in dmsO-*d*<sub>6</sub>

<sup>1</sup>H SA-SB-6  
<sup>1</sup>H SA-SB-6, DMSO-d<sub>6</sub>, 25/06/2019, SAIF, NEHU

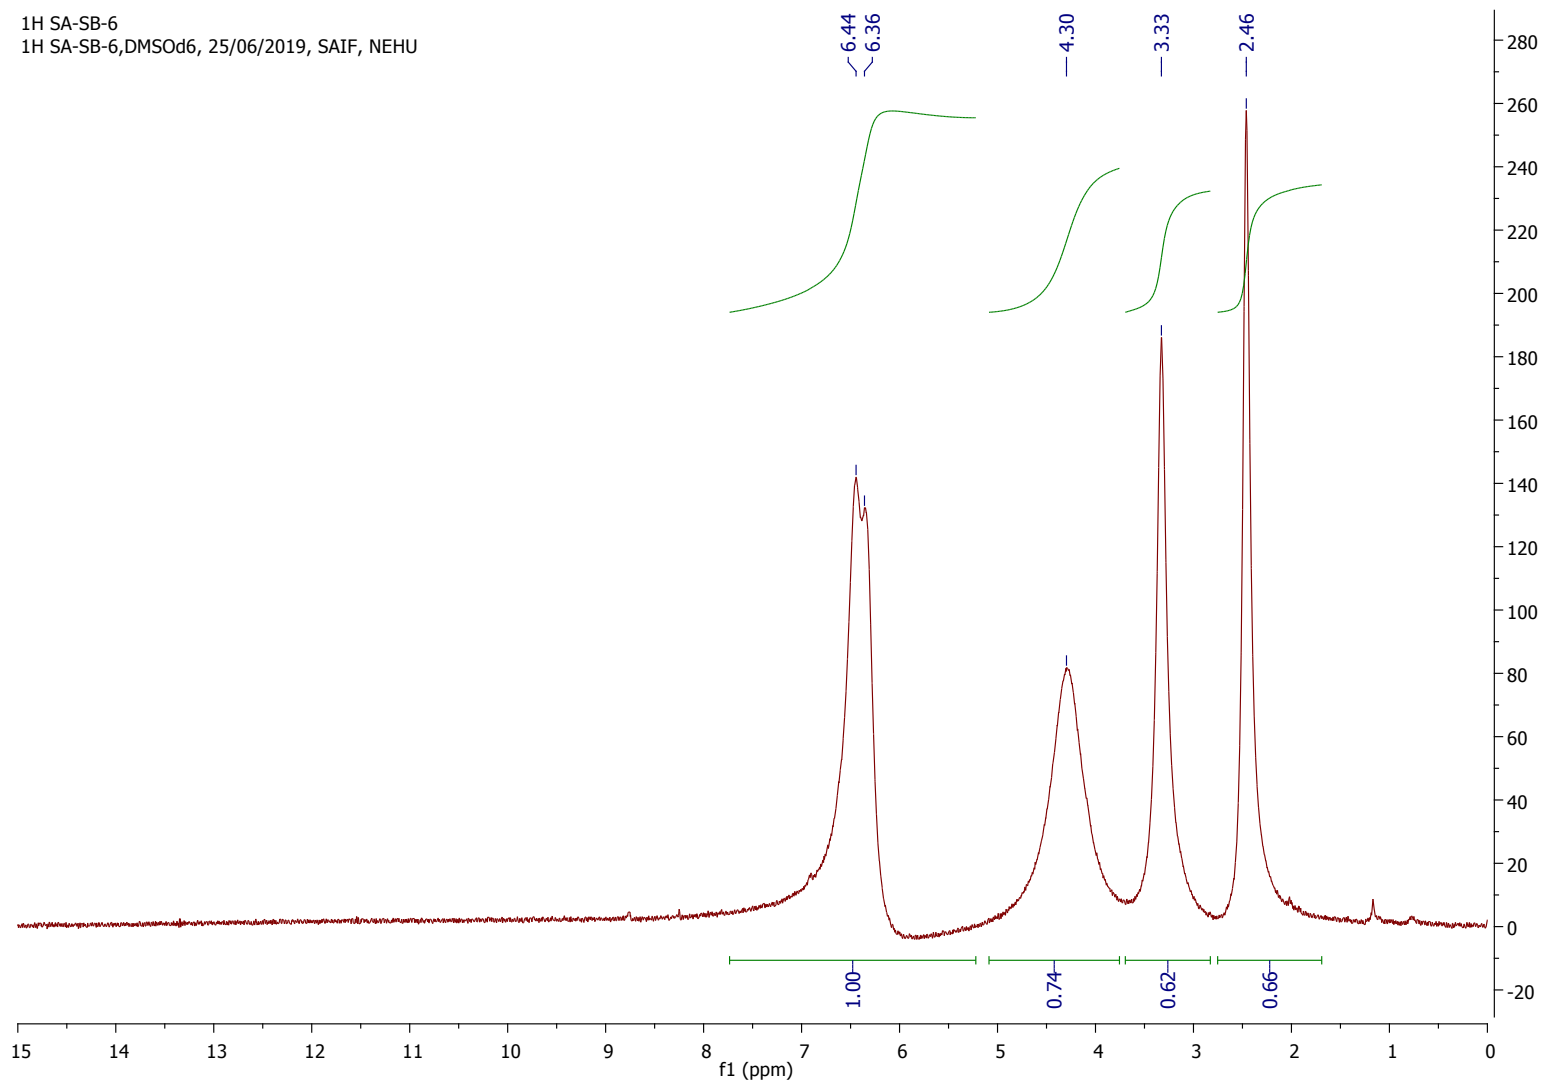

**Figure S6.** <sup>1</sup>H NMR Spectrum of complex **3** in dmsO-d<sub>6</sub>

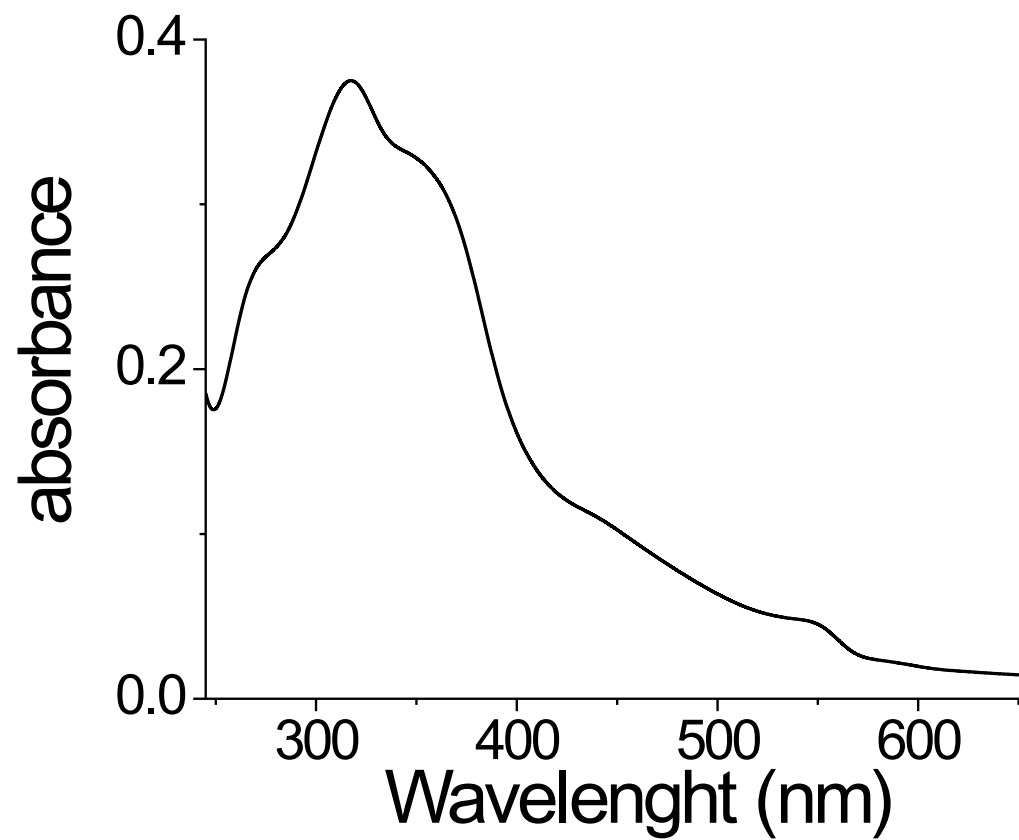

**Figure S7.** UV-Vis spectra of complex **1** ( $1 \times 10^{-4}$  M) in 4% DMSO in  $\text{CHCl}_3$

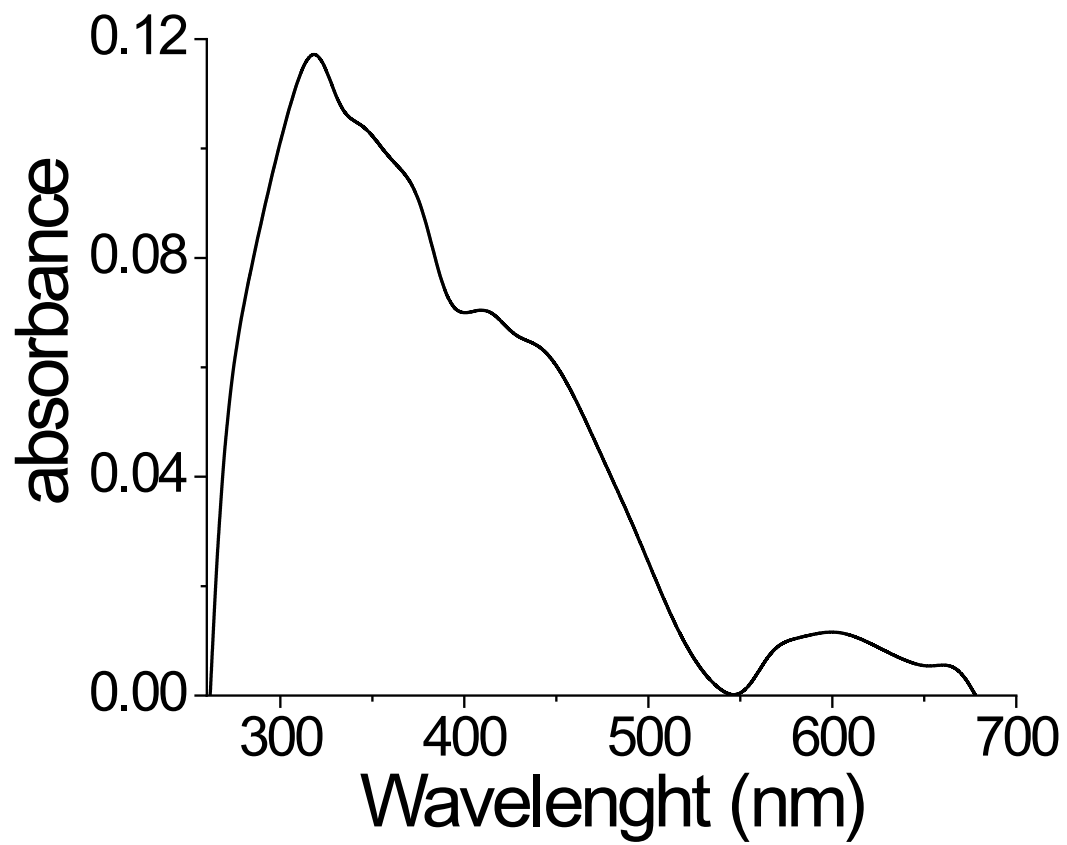

**Figure S8.** UV-Vis spectra of complex **2** ( $1 \times 10^{-4}$  M) in 4% DMSO in  $\text{CHCl}_3$

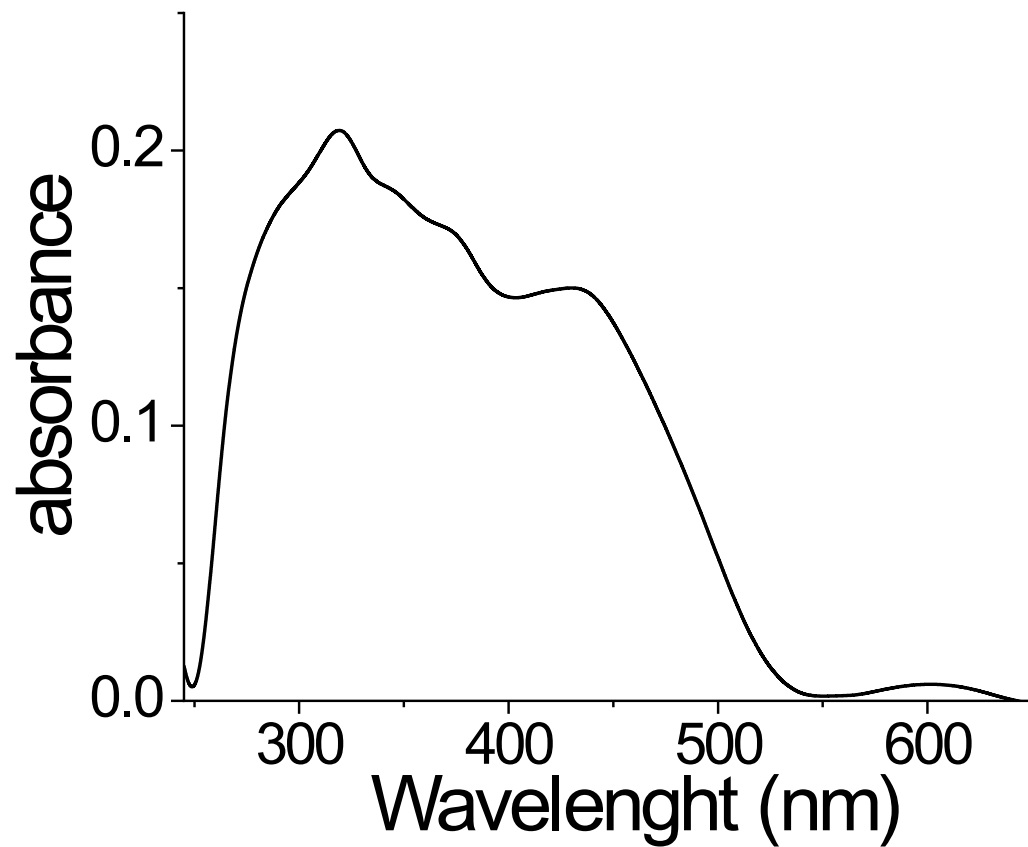

**Figure S9.** UV-Vis spectra of complex **3** ( $1 \times 10^{-4}$  M) in 4% DMSO in  $\text{CHCl}_3$

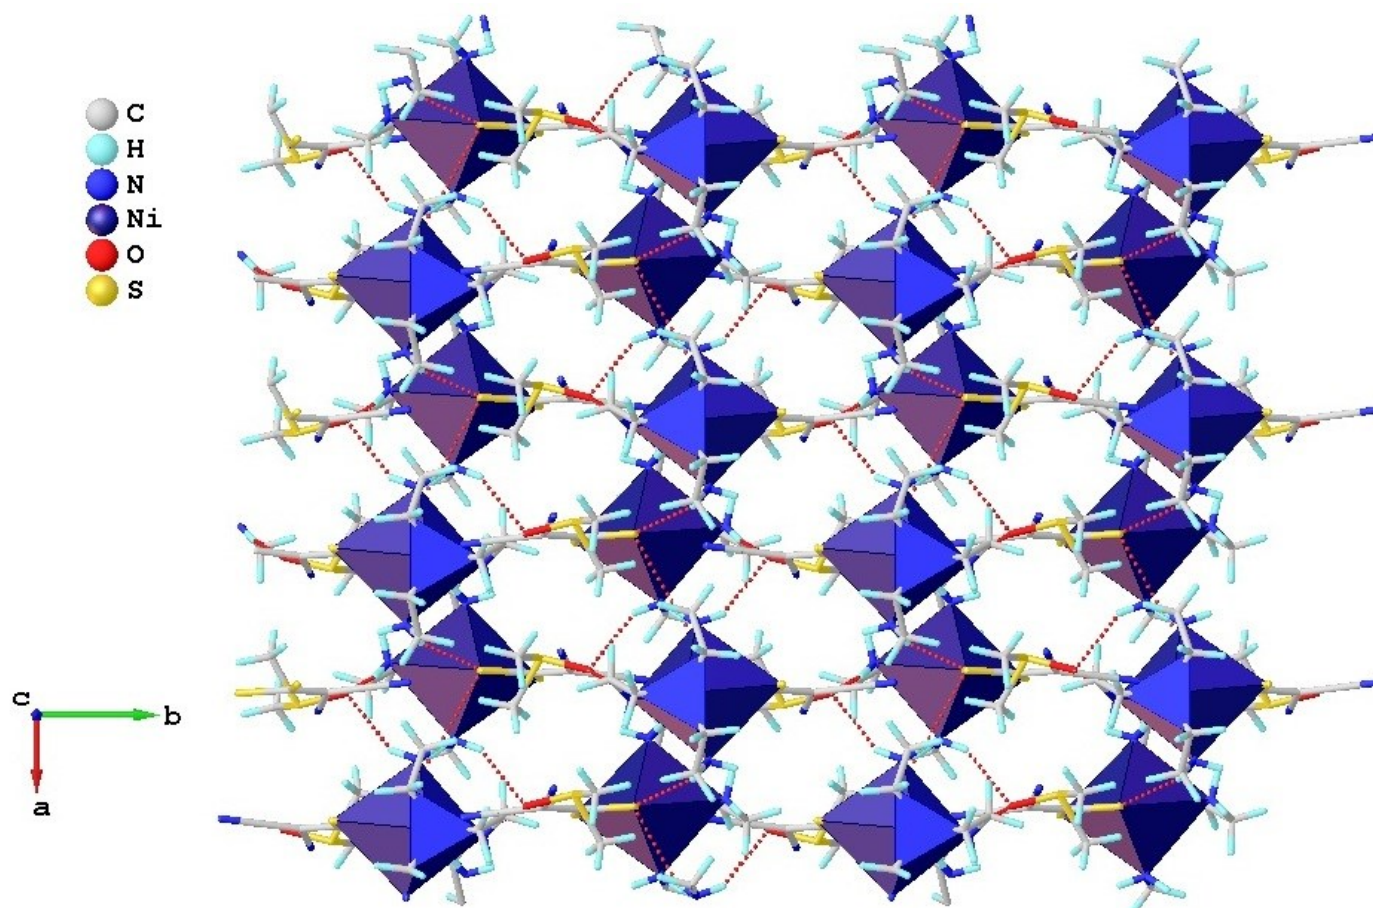

**Figure S10.** Partial view of 3D supramolecular framework of **1**.

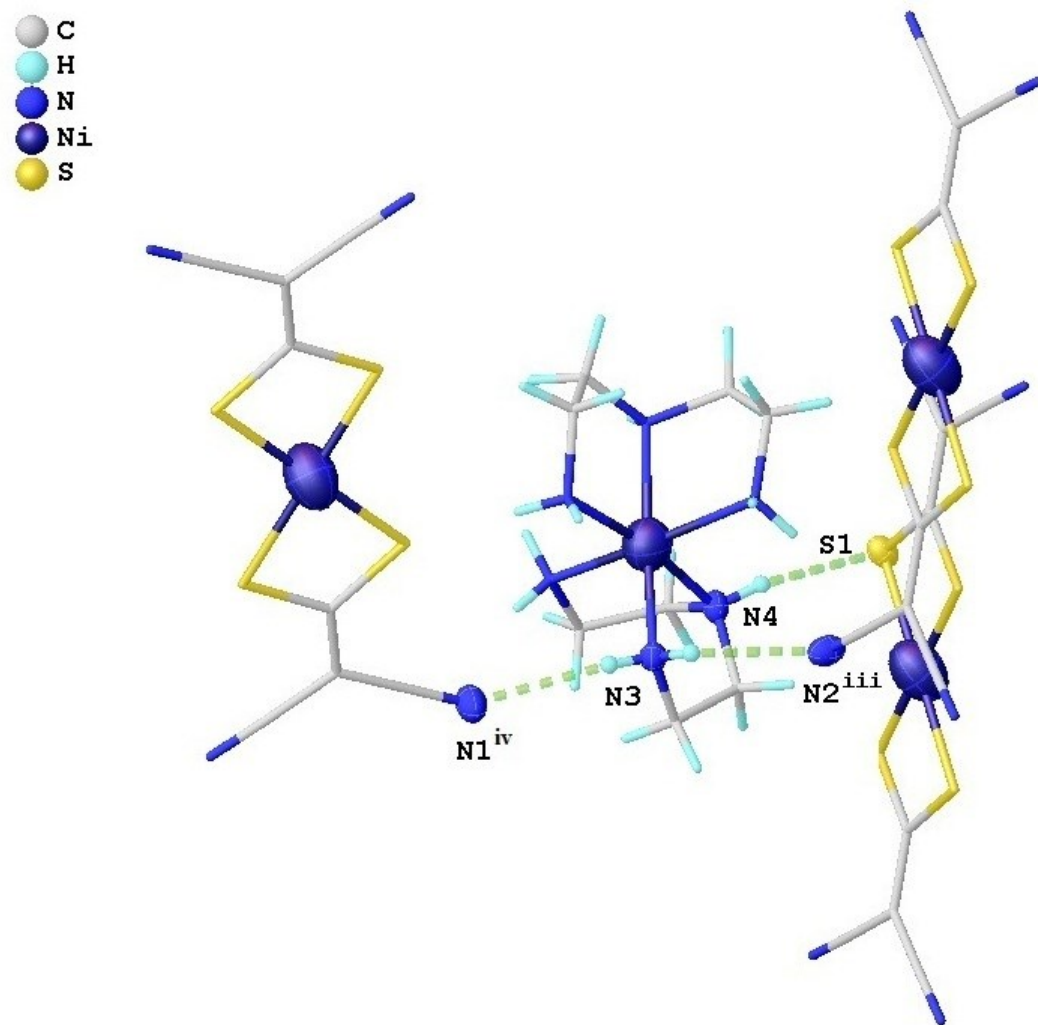

**Figure S11.** Partial view of hydrogen bonds in **2**.



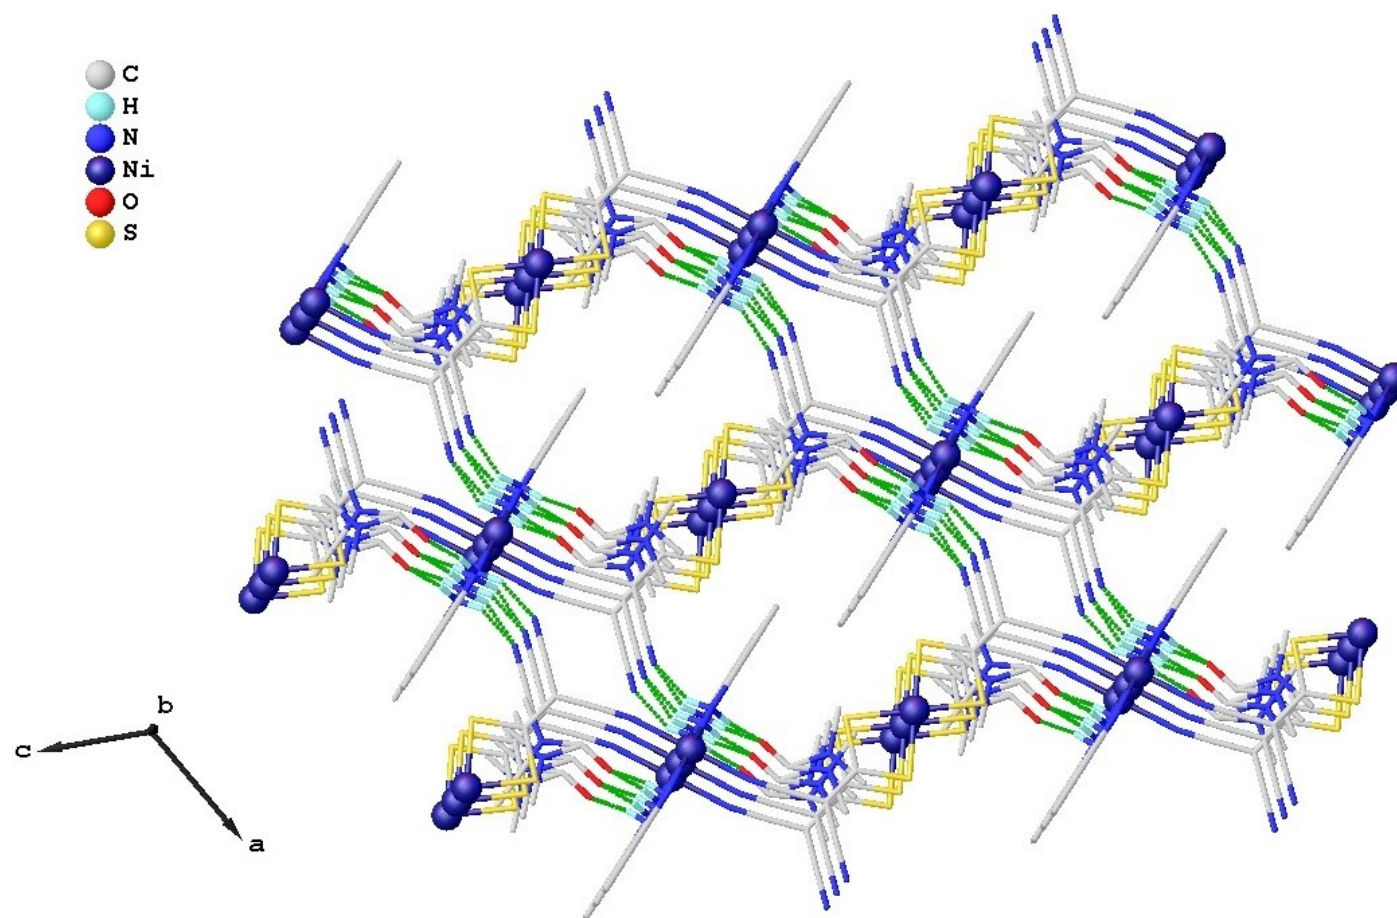

**Figure S12.** 3D architecture of **3** showing circular ribbon like stacking assembly.

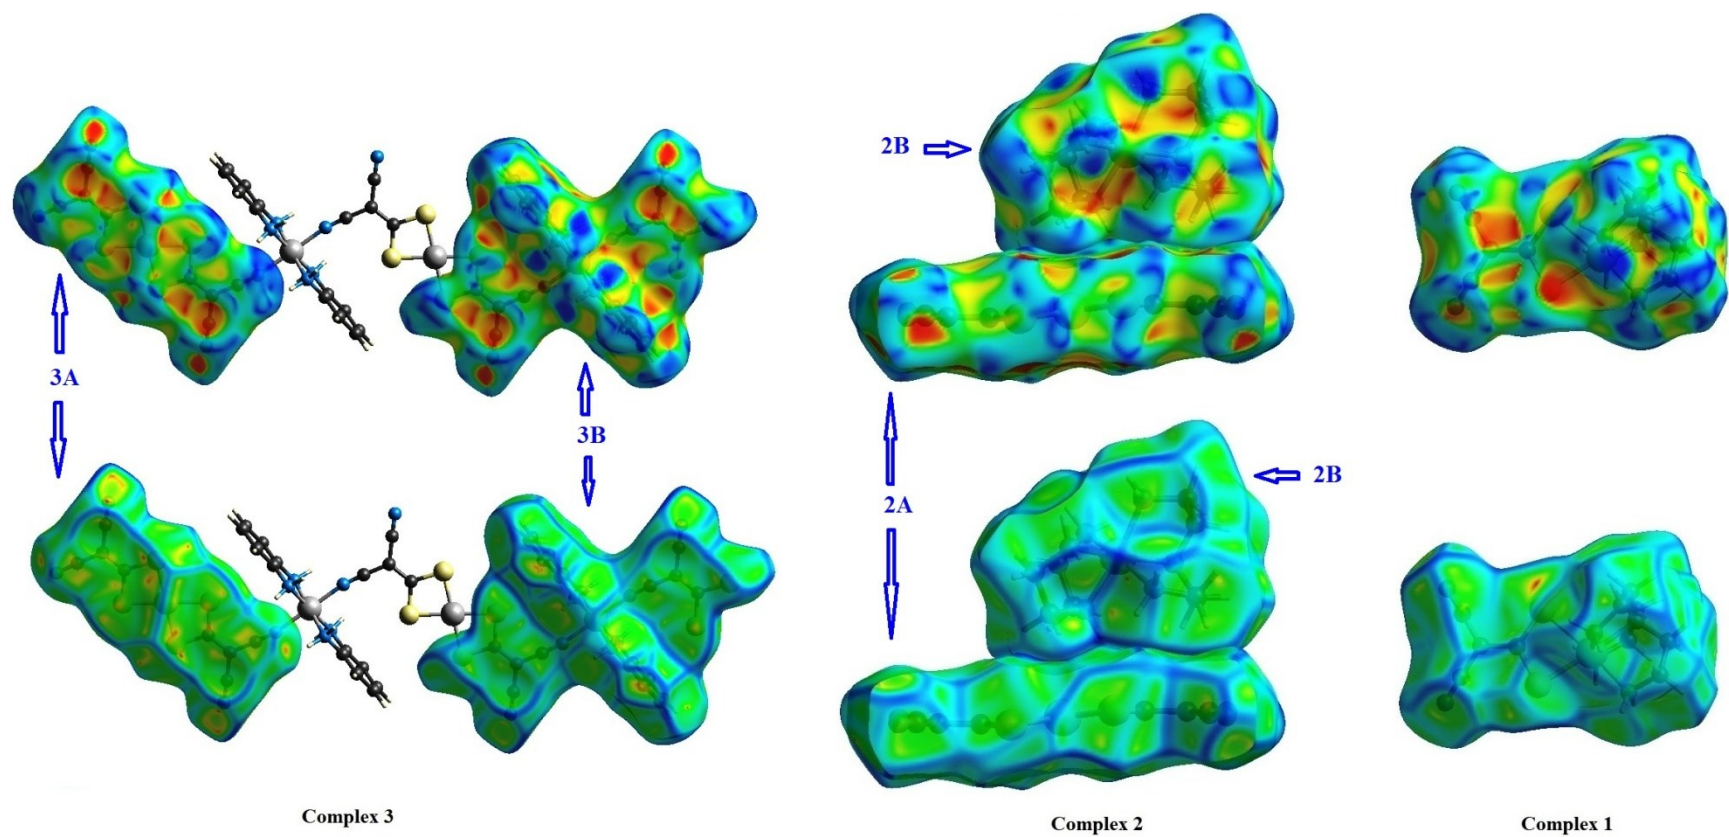

**Figure S13.** Hirshfeld surfaces mapped with shape index and curvedness for 1-3

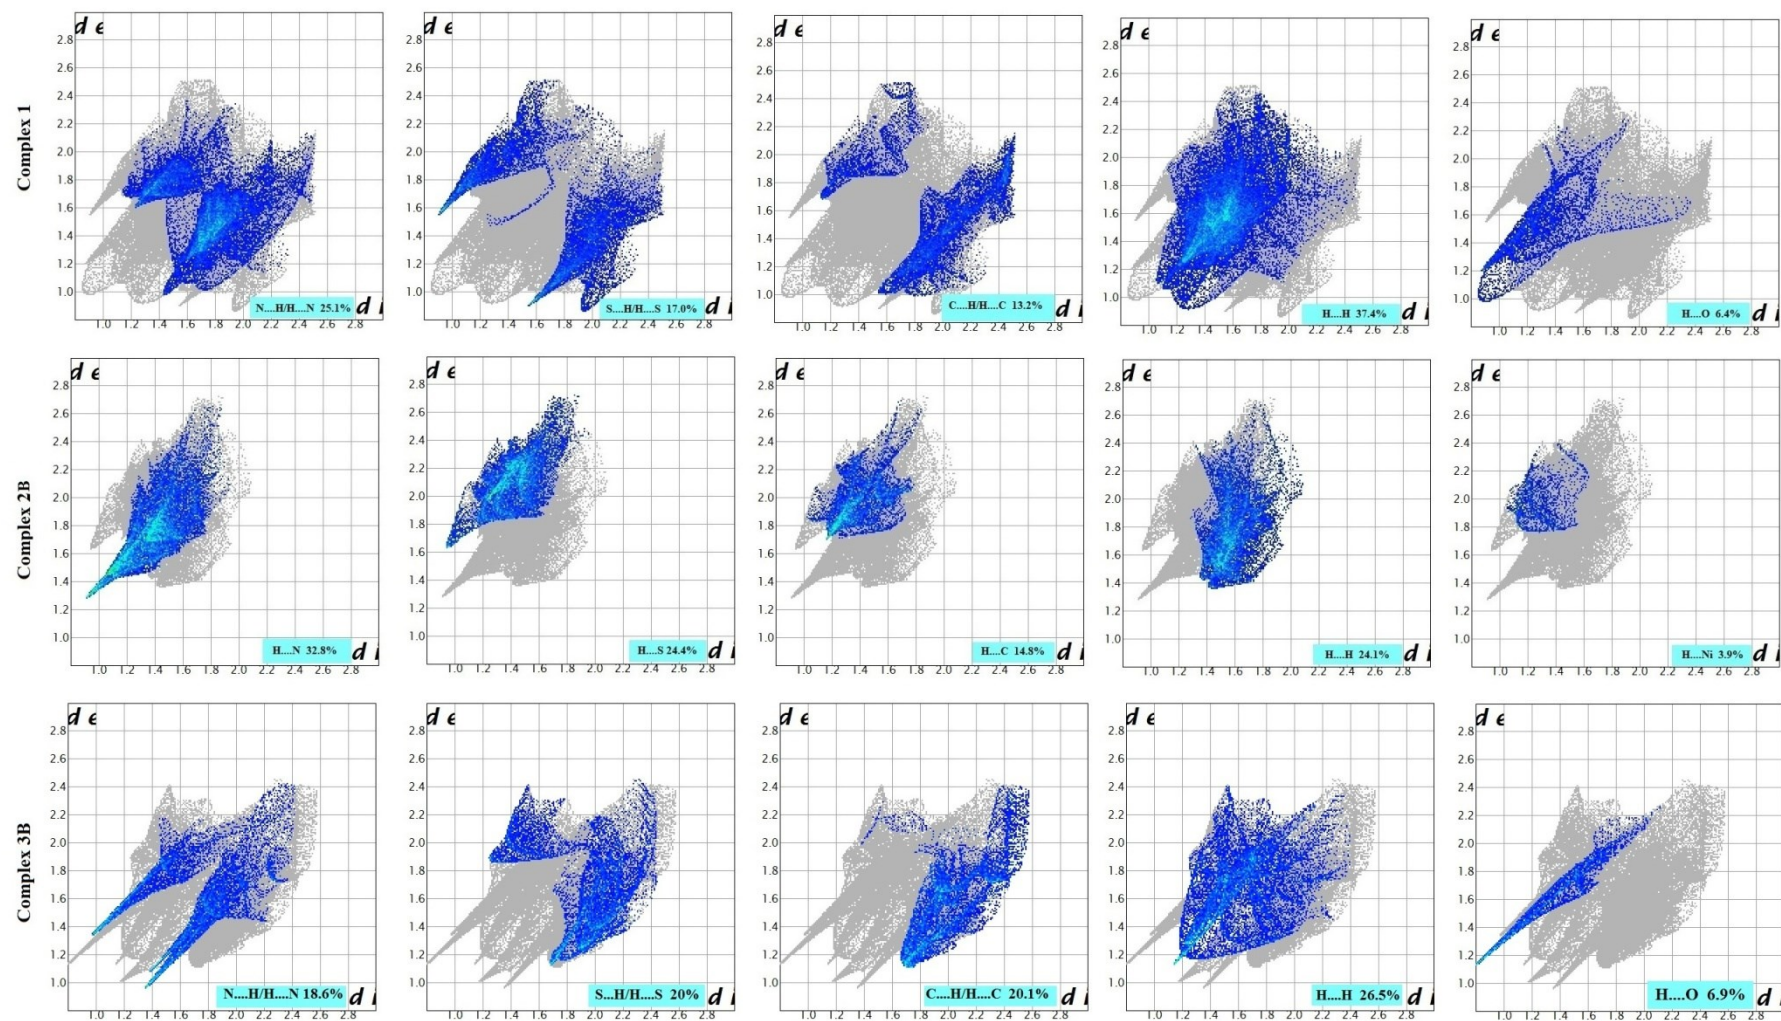

**Figure S14.** 2D fingerprint plots with di vs de for **1**, **2B** and **3B** showing N...H/H...N, S...H/H...S, C...H/H...C, H...H and H...O interactions (from left to right).



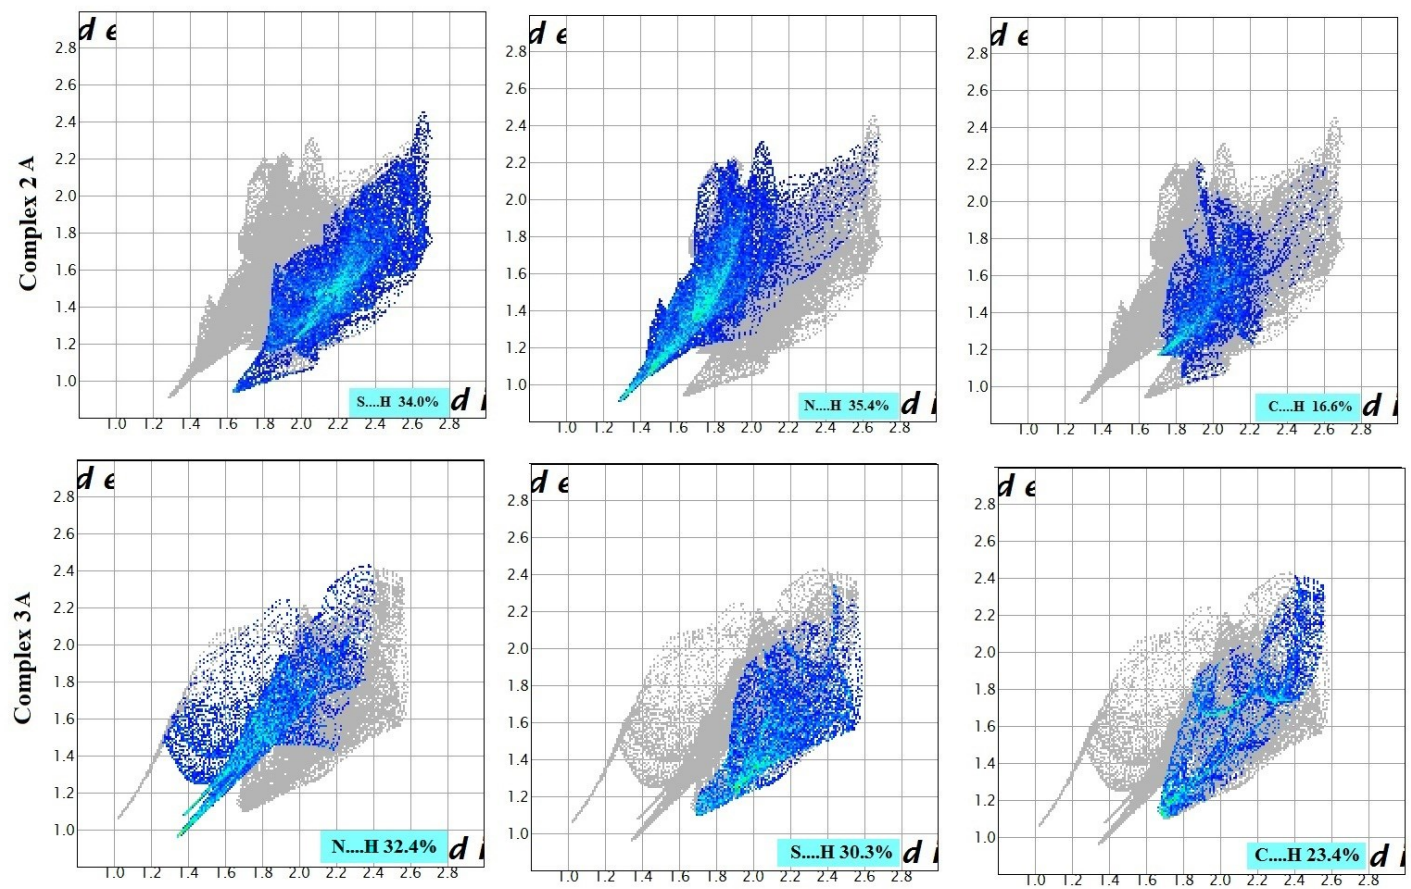

**Figure S15.** 2D fingerprint plots with di vs de for 2A and 3A showing S...H, N...H, and C...H interactions.

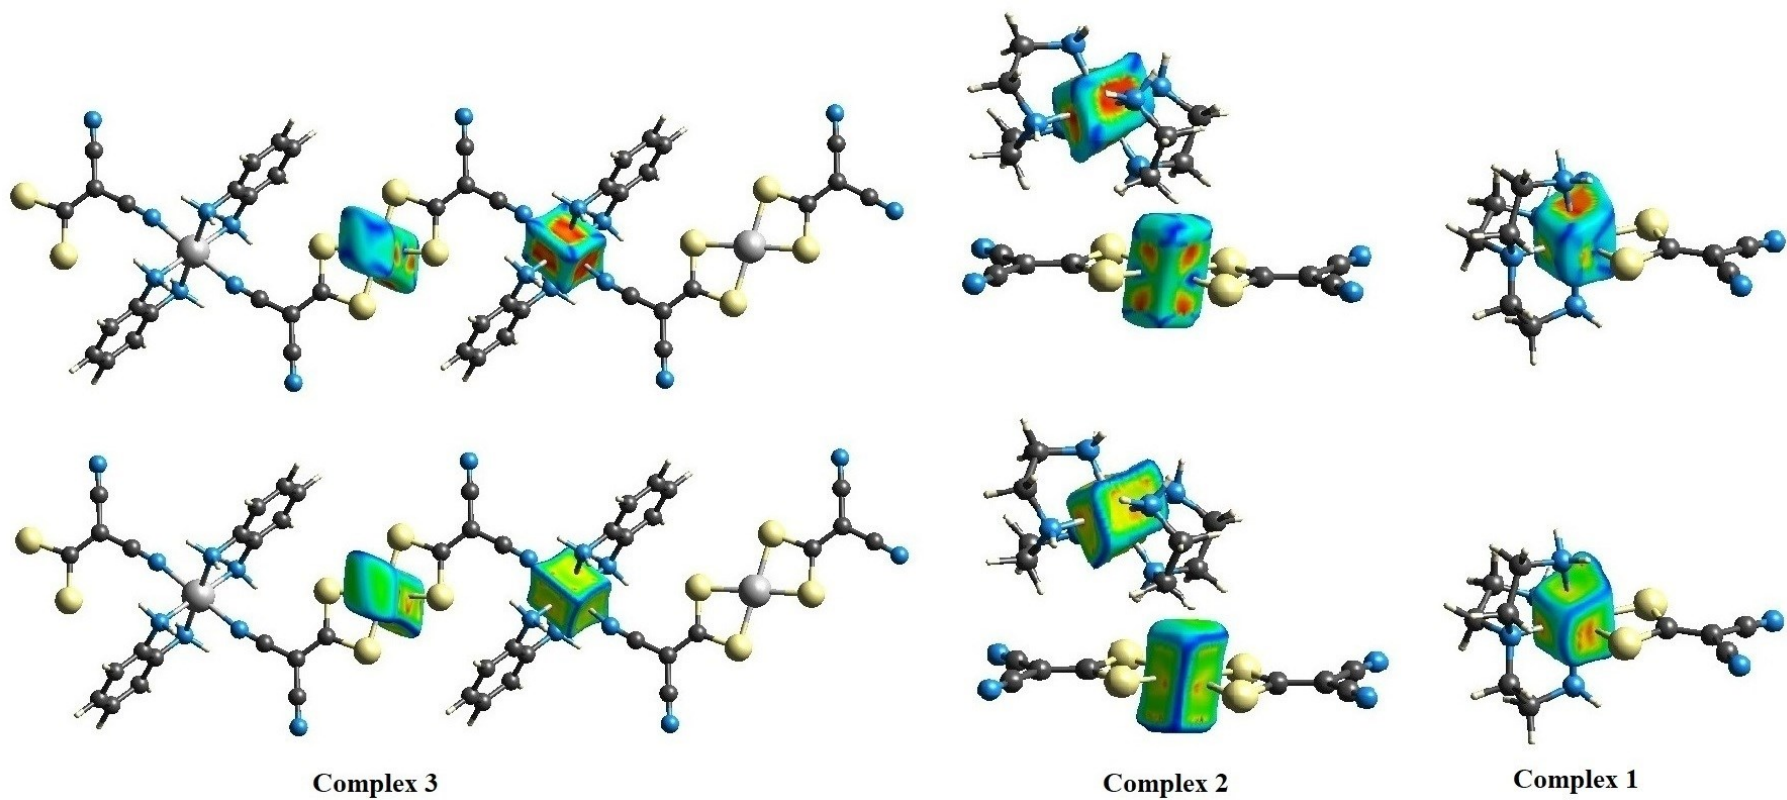

**Figure S16.** Views of Hirshfeld surfaces for nickel center in **1-3** mapped over shape index ( $s$ ) in the range  $-1.0 \text{ \AA}$  to  $1.0 \text{ \AA}$  and curvedness ( $c$ ) in the range  $-4.0 \text{ \AA}$  to  $0.4 \text{ \AA}$ .

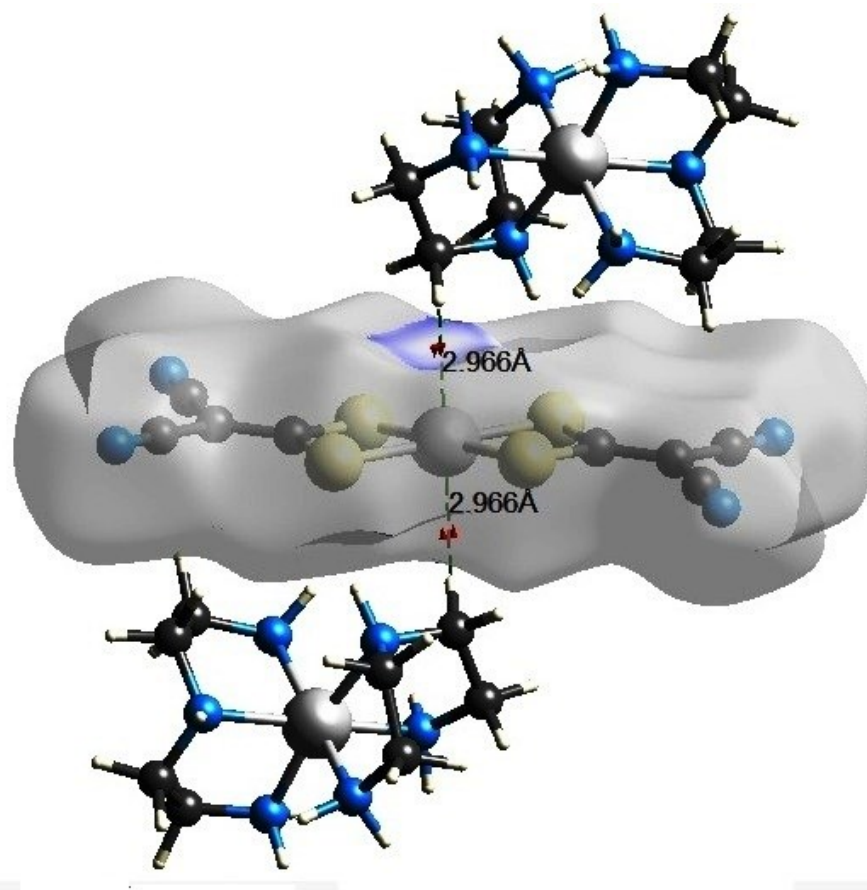

**Figure S17.** C-H...Ni interaction between  $[Ni(i-mnt)_2]^{2-}$  and  $[Ni(tren)_2]^{2+}$ .

**Table S1:** Bond lengths (Å) for 1-3.

| Bond length      |            |                      |             |           |           |
|------------------|------------|----------------------|-------------|-----------|-----------|
| <b>Complex 1</b> |            |                      |             |           |           |
| Ni1—N4           | 2.0971(19) | C21—H21B             | 0.98        | C13—H13A  | 0.99      |
| Ni1—N6           | 2.121(2)   | C22—H22A             | 0.98        | C14—H14A  | 0.99      |
| Ni1—S1           | 2.4080(6)  | C22—H22C             | 0.98        | C15—C16   | 1.523(3)  |
| S1—C1            | 1.724(2)   | S3A—C22A             | 1.769(17)   | C15—H15B  | 0.99      |
| N1—C3            | 1.157(4)   | C22A—H22D            | 0.98        | C16—H16B  | 0.99      |
| N3—C11           | 1.489(3)   | C22A—H22F            | 0.98        | S3—C22    | 1.778(3)  |
| N3—H3B           | 0.84(3)    | C21A—H21E            | 0.98        | C21—H21A  | 0.98      |
| N4—C15           | 1.480(3)   | Ni1—N5               | 2.102(2)    | C21—H21C  | 0.98      |
| N5—C13           | 1.475(3)   | Ni1—N3               | 2.122(2)    | C22—H22B  | 0.98      |
| N5—H5B           | 0.90(3)    | Ni1—S2               | 2.5260(6)   | S3A—O1A   | 1.496(18) |
| N6—H6A           | 0.82(4)    | S2—C1                | 1.711(2)    | S3A—C21A  | 1.772(18) |
| C1—C2            | 1.401(3)   | N2—C4                | 1.146(4)    | C22A—H22E | 0.98      |
| C2—C4            | 1.429(4)   | N3—H3A               | 0.88(3)     | C21A—H21D | 0.98      |
| C11—H11A         | 0.99       | N4—C12               | 1.477(3)    | C21A—H21F | 0.98      |
| C12—H12A         | 0.99       | N4—C14               | 1.496(3)    | C12—H12B  | 0.99      |
| C13—C14          | 1.529(4)   | N5—H5A               | 0.82(3)     | S3—C21    | 1.783(4)  |
| C13—H13B         | 0.99       | N6—C16               | 1.478(3)    | C11—H11B  | 0.99      |
| C14—H14B         | 0.99       | N6—H6B               | 0.92(4)     | S3—O1     | 1.507(2)  |
| C15—H15A         | 0.99       | C2—C3                | 1.416(4)    |           |           |
| C16—H16A         | 0.99       | C11—C12              | 1.522(3)    |           |           |
| <b>Complex 2</b> |            |                      |             |           |           |
| Ni2—N3           | 2.086 (3)  | Ni1—S2 <sup>ii</sup> | 2.2098 (10) | N1—C3     | 1.142 (5) |

|                     |           |                      |             |          |           |
|---------------------|-----------|----------------------|-------------|----------|-----------|
| N4—C12              | 1.483 (5) | C2—C4                | 1.428 (5)   | C12—H12B | 0.99      |
| Ni2—N3 <sup>i</sup> | 2.086 (3) | Ni1—S2               | 2.2098 (10) | N2—C4    | 1.145 (5) |
| N4—H4               | 0.86 (4)  | C2—C3                | 1.428 (5)   | C13—C14  | 1.513 (5) |
| Ni2—N4 <sup>i</sup> | 2.135 (3) | Ni1—S1 <sup>ii</sup> | 2.2129 (10) | N3—C11   | 1.464 (5) |
| N5—C13              | 1.474 (5) | C11—C12              | 1.523 (6)   | C13—H13A | 0.99      |
| Ni2—N4              | 2.135 (3) | Ni1—S1               | 2.2130 (10) | N3—H3A   | 0.87 (5)  |
| N5—H5A              | 0.87 (5)  | C11—H11A             | 0.99        | C13—H13B | 0.99      |
| Ni2—N5 <sup>i</sup> | 2.154 (3) | S1—C1                | 1.721 (4)   | N3—H3B   | 0.82 (6)  |
| N5—H5B              | 0.80 (4)  | C11—H11B             | 0.99        | C14—H14A | 0.99      |
| Ni2—N5              | 2.154 (3) | S2—C1                | 1.729 (4)   | N4—C14   | 1.478 (5) |
| C1—C2               | 1.381 (5) | C12—H12A             | 0.99        | C14—H14B | 0.99      |

### Complex 3

|                        |             |                       |            |                        |            |
|------------------------|-------------|-----------------------|------------|------------------------|------------|
| Ni1—S2                 | 2.1974 (14) | C2—C4                 | 1.427 (6)  | Ni2—N1 <sup>ii</sup>   | 2.110 (3)  |
| C13—C13 <sup>iii</sup> | 1.365 (8)   | N4—C22                | 1.447 (10) | N4A—C23A               | 1.421 (13) |
| Ni1—S2 <sup>i</sup>    | 2.1974 (14) | C3—N1                 | 1.145 (5)  | N3—C11                 | 1.456 (4)  |
| C13—H13                | 0.95        | C22—H22A              | 0.98       | C22A—H22D              | 0.98       |
| Ni1—S1 <sup>i</sup>    | 2.2125 (10) | C4—N2                 | 1.149 (6)  | N3—H3A                 | 0.920 (19) |
| O1—C21                 | 1.205 (6)   | C22—H22B              | 0.98       | C22A—H22E              | 0.98       |
| Ni1—S1                 | 2.2125 (10) | N1—Ni2                | 2.110 (3)  | N3—H3B                 | 0.916 (18) |
| C21—N4A                | 1.285 (11)  | C22—H22C              | 0.98       | C22A—H22F              | 0.98       |
| S1—C1                  | 1.707 (4)   | Ni2—N3                | 2.088 (2)  | C11—C11 <sup>iii</sup> | 1.381 (6)  |
| C21—N4                 | 1.350 (9)   | C23—H23A              | 0.98       | C23A—H23D              | 0.98       |
| S2—C1                  | 1.719 (4)   | Ni2—N3 <sup>ii</sup>  | 2.088 (2)  | C11—C12                | 1.382 (4)  |
| C21—H21                | 0.95        | C23—H23B              | 0.98       | C23A—H23E              | 0.98       |
| C1—C2                  | 1.400 (6)   | Ni2—N3 <sup>iii</sup> | 2.088 (2)  | C12—C13                | 1.394 (5)  |



|          |           |                      |            |           |      |
|----------|-----------|----------------------|------------|-----------|------|
| C21—H21A | 0.95      | C23—H23C             | 0.98       | C23A—H23F | 0.98 |
| C2—C3    | 1.409 (5) | Ni2—N3 <sup>iv</sup> | 2.088 (2)  | C12—H12   | 0.95 |
| N4—C23   | 1.441 (9) | N4A—C22A             | 1.421 (13) |           |      |

Symmetry codes: For **2** (i)  $-x+1, y, -z+\frac{1}{2}$ ; (ii)  $-x+1, -y+1, -z$ ; for **3** (i)  $-x+2, -y-2, -z+1$ ; (ii)  $-x+2, -y-2, -z$ ; (iii)  $x, -y-2, z$ ; (iv)  $-x+2, y, -z$

**Table S2:** Bond angles ( $^{\circ}$ ) of **1-3**.

| Bond angle       |            |                |            |              |            |
|------------------|------------|----------------|------------|--------------|------------|
| <b>Complex 1</b> |            |                |            |              |            |
| N4—Ni1—N5        | 83.60(8)   | H15A—C15—H15B  | 108.2      | C2—C1—S2     | 122.48(19) |
| N5—Ni1—N6        | 92.12(9)   | N6—C16—H16A    | 109.8      | S2—C1—S1     | 116.67(14) |
| N5—Ni1—N3        | 94.27(9)   | N6—C16—H16B    | 109.8      | C1—C2—C4     | 121.8(2)   |
| N4—Ni1—S1        | 174.89(6)  | H16A—C16—H16B  | 108.2      | N1—C3—C2     | 177.7(4)   |
| N6—Ni1—S1        | 95.26(6)   | O1—S3—C21      | 106.44(18) | N3—C11—C12   | 109.96(19) |
| N4—Ni1—S2        | 102.42(6)  | S3—C21—H21A    | 109.5      | C12—C11—H11A | 109.7      |
| N6—Ni1—S2        | 88.33(7)   | H21A—C21—H21B  | 109.5      | C12—C11—H11B | 109.7      |
| S1—Ni1—S2        | 72.64(2)   | H21A—C21—H21C  | 109.5      | N4—C12—C11   | 110.09(19) |
| C1—S2—Ni1        | 83.52(8)   | S3—C22—H22A    | 109.5      | C11—C12—H12A | 109.6      |
| C11—N3—H3A       | 105.8(18)  | H22A—C22—H22B  | 109.5      | C11—C12—H12B | 109.6      |
| C11—N3—H3B       | 104.(2)    | H22A—C22—H22C  | 109.5      | N5—C13—C14   | 110.2(2)   |
| H3A—N3—H3B       | 115.(3)    | O1A—S3A—C22A   | 107.(2)    | C14—C13—H13A | 109.6      |
| C12—N4—C14       | 111.98(19) | C22A—S3A—C21A  | 99.(2)     | C14—C13—H13B | 109.6      |
| C12—N4—Ni1       | 105.38(14) | S3A—C22A—H22E  | 109.5      | N4—C14—C13   | 112.6(2)   |
| C14—N4—Ni1       | 109.54(15) | S3A—C22A—H22F  | 109.5      | C13—C14—H14A | 109.1      |
| C13—N5—H5A       | 111.(2)    | H22E—C22A—H22F | 109.5      | C13—C14—H14B | 109.1      |

|                        |            |                |            |                |            |
|------------------------|------------|----------------|------------|----------------|------------|
| C13—N5—H5B             | 106.2(19)  | S3A—C21A—H21E  | 109.5      | N4—C15—C16     | 109.84(19) |
| H5A—N5—H5B             | 107.(3)    | S3A—C21A—H21F  | 109.5      | C16—C15—H15A   | 109.7      |
| C16—N6—H6A             | 109.(2)    | H21E—C21A—H21F | 109.5      | C16—C15—H15B   | 109.7      |
| C16—N6—H6B             | 109.(2)    | N4—Ni1—N6      | 83.19(8)   | N6—C16—C15     | 109.5(2)   |
| H6A—N6—H6B             | 104.(3)    | N4—Ni1—N3      | 81.75(8)   | C15—C16—H16A   | 109.8      |
| C2—C1—S1               | 120.84(18) | N6—Ni1—N3      | 162.87(8)  | C15—C16—H16B   | 109.8      |
| C1—C2—C3               | 121.3(2)   | N5—Ni1—S1      | 101.34(6)  | O1—S3—C22      | 105.13(15) |
| C3—C2—C4               | 116.8(2)   | N3—Ni1—S1      | 99.03(6)   | C22—S3—C21     | 98.1(2)    |
| N2—C4—C2               | 178.9(3)   | N5—Ni1—S2      | 173.98(6)  | S3—C21—H21B    | 109.5      |
| N3—C11—H11A            | 109.7      | N3—Ni1—S2      | 86.98(6)   | S3—C21—H21C    | 109.5      |
| N3—C11—H11B            | 109.7      | C1—S1—Ni1      | 86.96(8)   | H21B—C21—H21C  | 109.5      |
| H11A—C11—H11B          | 108.2      | C11—N3—Ni1     | 110.87(15) | S3—C22—H22B    | 109.5      |
| N4—C12—H12A            | 109.6      | Ni1—N3—H3A     | 103.8(18)  | S3—C22—H22C    | 109.5      |
| N4—C12—H12B            | 109.6      | Ni1—N3—H3B     | 118.(2)    | H22B—C22—H22C  | 109.5      |
| H12A—C12—H12B          | 108.2      | C12—N4—C15     | 112.28(19) | O1A—S3A—C21A   | 108.(3)    |
| N5—C13—H13A            | 109.6      | C15—N4—C14     | 111.0(2)   | S3A—C22A—H22D  | 109.5      |
| N5—C13—H13B            | 109.6      | C15—N4—Ni1     | 106.35(14) | H22D—C22A—H22E | 109.5      |
| H13A—C13—H13B          | 108.1      | C13—N5—Ni1     | 106.28(15) | H22D—C22A—H22F | 109.5      |
| N4—C14—H14A            | 109.1      | Ni1—N5—H5A     | 108.(2)    | S3A—C21A—H21D  | 109.5      |
| N4—C14—H14B            | 109.1      | Ni1—N5—H5B     | 117.8(19)  | H21D—C21A—H21E | 109.5      |
| H14A—C14—H14B          | 107.8      | C16—N6—Ni1     | 109.04(15) | H21D—C21A—H21F | 109.5      |
| N4—C15—H15A            | 109.7      | Ni1—N6—H6A     | 111.(2)    |                |            |
| N4—C15—H15B            | 109.7      | Ni1—N6—H6B     | 114.(2)    |                |            |
| <b>Complex 2</b>       |            |                |            |                |            |
| N3—Ni2—N3 <sup>i</sup> | 92.57 (19) | N3—C11—C12     | 108.9 (3)  | Ni2—N3—H3A     | 107 (3)    |

|                                      |             |                                        |            |               |           |
|--------------------------------------|-------------|----------------------------------------|------------|---------------|-----------|
| Ni2—N5—H5A                           | 104 (3)     | N4—Ni2—N5                              | 80.46 (12) | N5—C13—H13A   | 109.8     |
| N3—Ni2—N4 <sup>i</sup>               | 171.53 (13) | N3—C11—H11A                            | 109.9      | C11—N3—H3B    | 112 (4)   |
| C13—N5—H5B                           | 105 (3)     | N5 <sup>i</sup> —Ni2—N5                | 168.5 (2)  | C14—C13—H13A  | 109.8     |
| N3 <sup>i</sup> —Ni2—N4 <sup>i</sup> | 82.70 (13)  | C12—C11—H11A                           | 109.9      | Ni2—N3—H3B    | 108 (4)   |
| Ni2—N5—H5B                           | 113 (3)     | S2 <sup>ii</sup> —Ni1—S2               | 180.0      | N5—C13—H13B   | 109.8     |
| N3—Ni2—N4                            | 82.70 (13)  | N3—C11—H11B                            | 109.9      | H3A—N3—H3B    | 111 (5)   |
| H5A—N5—H5B                           | 107 (4)     | S2 <sup>ii</sup> —Ni1—S1 <sup>ii</sup> | 79.07 (4)  | C14—C13—H13B  | 109.8     |
| N3 <sup>i</sup> —Ni2—N4              | 171.53 (13) | C12—C11—H11B                           | 109.9      | C14—N4—C12    | 115.1 (3) |
| C2—C1—S1                             | 126.2 (3)   | S2—Ni1—S1 <sup>ii</sup>                | 100.93 (4) | H13A—C13—H13B | 108.2     |
| N4 <sup>i</sup> —Ni2—N4              | 102.83 (18) | H11A—C11—H11B                          | 108.3      | C14—N4—Ni2    | 108.0 (2) |
| C2—C1—S2                             | 124.5 (3)   | S2 <sup>ii</sup> —Ni1—S1               | 100.93 (4) | N4—C14—C13    | 111.3 (3) |
| N3—Ni2—N5 <sup>i</sup>               | 93.00 (13)  | N4—C12—C11                             | 112.7 (3)  | C12—N4—Ni2    | 108.1 (2) |
| S1—C1—S2                             | 109.4 (2)   | S2—Ni1—S1                              | 79.07 (4)  | N4—C14—H14A   | 109.4     |
| N3 <sup>i</sup> —Ni2—N5 <sup>i</sup> | 94.91 (14)  | N4—C12—H12A                            | 109.1      | C14—N4—H4     | 107 (3)   |
| C1—C2—C4                             | 120.1 (3)   | S1 <sup>ii</sup> —Ni1—S1               | 180.0      | C13—C14—H14A  | 109.4     |
| N4 <sup>i</sup> —Ni2—N5 <sup>i</sup> | 80.46 (12)  | C11—C12—H12A                           | 109.1      | C12—N4—H4     | 104 (3)   |
| C1—C2—C3                             | 121.3 (3)   | C1—S1—Ni1                              | 85.53 (13) | N4—C14—H14B   | 109.4     |
| N4—Ni2—N5 <sup>i</sup>               | 92.36 (14)  | N4—C12—H12B                            | 109.1      | Ni2—N4—H4     | 115 (3)   |
| C4—C2—C3                             | 118.6 (3)   | C1—S2—Ni1                              | 85.44 (13) | C13—C14—H14B  | 109.4     |
| N3—Ni2—N5                            | 94.91 (14)  | C11—C12—H12B                           | 109.1      | C13—N5—Ni2    | 112.1 (2) |
| N1—C3—C2                             | 179.3 (5)   | C11—N3—Ni2                             | 110.5 (2)  | H14A—C14—H14B | 108.0     |
| N3 <sup>i</sup> —Ni2—N5              | 93.00 (13)  | H12A—C12—H12B                          | 107.8      | C13—N5—H5A    | 117 (3)   |
| N2—C4—C2                             | 179.0 (4)   | C11—N3—H3A                             | 109 (3)    |               |           |
| N4 <sup>i</sup> —Ni2—N5              | 92.36 (14)  | N5—C13—C14                             | 109.6 (3)  |               |           |

### Complex 3

|                                      |            |                                         |             |                                         |             |
|--------------------------------------|------------|-----------------------------------------|-------------|-----------------------------------------|-------------|
| S2—Ni1—S2 <sup>i</sup>               | 180.0      | N1—C3—C2                                | 177.2 (4)   | N3 <sup>ii</sup> —Ni2—N1 <sup>ii</sup>  | 89.79 (9)   |
| C11—C12—H12                          | 120.1      | N4—C22—H22A                             | 109.5       | C22A—N4A—C23A                           | 123.6 (15)  |
| S2—Ni1—S1 <sup>i</sup>               | 100.72 (4) | N2—C4—C2                                | 179.0 (4)   | N3 <sup>iii</sup> —Ni2—N1 <sup>ii</sup> | 90.21 (9)   |
| C13—C12—H12                          | 120.1      | N4—C22—H22B                             | 109.5       | N4A—C22A—H22D                           | 109.5       |
| S2 <sup>i</sup> —Ni1—S1 <sup>i</sup> | 79.28 (4)  | C3—N1—Ni2                               | 170.1 (3)   | N3 <sup>iv</sup> —Ni2—N1 <sup>ii</sup>  | 89.79 (9)   |
| C13 <sup>iii</sup> —C13—C12          | 120.1 (2)  | H22A—C22—H22B                           | 109.5       | N4A—C22A—H22E                           | 109.5       |
| S2—Ni1—S1                            | 79.28 (4)  | N3—Ni2—N3 <sup>ii</sup>                 | 180.0       | N1—Ni2—N1 <sup>ii</sup>                 | 180.0       |
| C13 <sup>iii</sup> —C13—H13          | 119.9      | N4—C22—H22C                             | 109.5       | H22D—C22A—H22E                          | 109.5       |
| S2 <sup>i</sup> —Ni1—S1              | 100.72 (4) | N3—Ni2—N3 <sup>iii</sup>                | 83.21 (13)  | C11—N3—Ni2                              | 109.70 (18) |
| C12—C13—H13                          | 119.9      | H22A—C22—H22C                           | 109.5       | N4A—C22A—H22F                           | 109.5       |
| S1 <sup>i</sup> —Ni1—S1              | 180.0      | N3 <sup>ii</sup> —Ni2—N3 <sup>iii</sup> | 96.79 (13)  | C11—N3—H3A                              | 112 (2)     |
| O1—C21—N4A                           | 142.6 (9)  | H22B—C22—H22C                           | 109.5       | H22D—C22A—H22F                          | 109.5       |
| C1—S1—Ni1                            | 85.07 (14) | N3—Ni2—N3 <sup>iv</sup>                 | 96.79 (13)  | Ni2—N3—H3A                              | 112 (2)     |
| O1—C21—N4                            | 119.4 (7)  | N4—C23—H23A                             | 109.5       | H22E—C22A—H22F                          | 109.5       |
| C1—S2—Ni1                            | 85.25 (14) | N3 <sup>ii</sup> —Ni2—N3 <sup>iv</sup>  | 83.21 (13)  | C11—N3—H3B                              | 112 (2)     |
| O1—C21—H21                           | 120.3      | N4—C23—H23B                             | 109.5       | N4A—C23A—H23D                           | 109.5       |
| C2—C1—S1                             | 124.9 (3)  | N3 <sup>iii</sup> —Ni2—N3 <sup>iv</sup> | 180.00 (10) | Ni2—N3—H3B                              | 105 (2)     |
| N4—C21—H21                           | 120.3      | H23A—C23—H23B                           | 109.5       | N4A—C23A—H23E                           | 109.5       |
| C2—C1—S2                             | 124.7 (3)  | N3—Ni2—N1                               | 89.79 (9)   | H3A—N3—H3B                              | 105 (3)     |
| O1—C21—H21A                          | 108.7      | N4—C23—H23C                             | 109.5       | H23D—C23A—H23E                          | 109.5       |
| S1—C1—S2                             | 110.4 (2)  | N3 <sup>ii</sup> —Ni2—N1                | 90.21 (9)   | C11 <sup>iii</sup> —C11—C12             | 120.06 (19) |
| N4A—C21—H21A                         | 108.7      | H23A—C23—H23C                           | 109.5       | N4A—C23A—H23F                           | 109.5       |
| C1—C2—C3                             | 119.0 (3)  | N3 <sup>iii</sup> —Ni2—N1               | 89.79 (9)   | C11 <sup>iii</sup> —C11—N3              | 118.56 (15) |
| C21—N4—C23                           | 121.2 (7)  | H23B—C23—H23C                           | 109.5       | H23D—C23A—H23F                          | 109.5       |
| C1—C2—C4                             | 121.8 (3)  | N3 <sup>iv</sup> —Ni2—N1                | 90.21 (9)   | C12—C11—N3                              | 121.4 (3)   |
| C21—N4—C22                           | 120.1 (7)  | C21—N4A—C22A                            | 119.5 (13)  | H23E—C23A—H23F                          | 109.5       |
| C3—C2—C4                             | 119.2 (4)  | N3—Ni2—N1 <sup>ii</sup>                 | 90.21 (9)   | C11—C12—C13                             | 119.8 (3)   |
| C23—N4—C22                           | 118.7 (8)  | C21—N4A—C23A                            | 117.0 (13)  |                                         |             |

Symmetry codes: For **2** (i)  $-x+1, y, -z+\frac{1}{2}$ ; (ii)  $-x+1, -y+1, -z$ ; for **3** (i)  $-x+2, -y-2, -z+1$ ; (ii)  $-x+2, -y-2, -z$ ; (iii)  $x, -y-2, z$ ; (iv)  $-x+2, y, -z$

**Table S3:** Torsion angles ( $^{\circ}$ ) of 1-3.

| <b>Torsion angle</b> |            |                |            |
|----------------------|------------|----------------|------------|
| <b>Complex 1</b>     |            |                |            |
| Ni1—S2—C1—C2         | -175.0(2)  | Ni1—S2—C1—S1   | 4.24(11)   |
| Ni1—S1—C1—C2         | 174.8(2)   | Ni1—S1—C1—S2   | -4.43(12)  |
| S2—C1—C2—C3          | 172.6(2)   | S1—C1—C2—C3    | -6.6(4)    |
| S2—C1—C2—C4          | -4.6(4)    | S1—C1—C2—C4    | 176.2(2)   |
| Ni1—N3—C11—C12       | 17.9(3)    | C15—N4—C12—C11 | 165.6(2)   |
| C14—N4—C12—C11       | -68.7(3)   | Ni1—N4—C12—C11 | 50.3(2)    |
| N3—C11—C12—N4        | -46.0(3)   | Ni1—N5—C13—C14 | -44.7(2)   |
| C12—N4—C14—C13       | 98.9(2)    | C15—N4—C14—C13 | -134.7(2)  |
| Ni1—N4—C14—C13       | -17.6(3)   | N5—C13—C14—N4  | 42.5(3)    |
| C12—N4—C15—C16       | -159.9(2)  | C14—N4—C15—C16 | 74.0(3)    |
| Ni1—N4—C15—C16       | -45.1(2)   | Ni1—N6—C16—C15 | -31.5(3)   |
| N4—C15—C16—N6        | 52.2(3)    |                |            |
| <b>Complex 2</b>     |            |                |            |
| Ni1—S1—C1—C2         | 172.8 (3)  | S1—C1—C2—C4    | -176.3 (3) |
| Ni2—N3—C11—C12       | 38.7 (4)   | Ni2—N5—C13—C14 | -26.1 (4)  |
| Ni1—S1—C1—S2         | -6.76 (16) | S2—C1—C2—C4    | 3.2 (5)    |
| C14—N4—C12—C11       | -90.8 (4)  | C12—N4—C14—C13 | 77.0 (4)   |
| Ni1—S2—C1—C2         | -172.8 (3) | S1—C1—C2—C3    | 0.9 (6)    |
| Ni2—N4—C12—C11       | 30.0 (4)   | Ni2—N4—C14—C13 | -43.9 (4)  |
| Ni1—S2—C1—S1         | 6.77 (16)  | S2—C1—C2—C3    | -179.6 (3) |

|                                 |            |                               |            |
|---------------------------------|------------|-------------------------------|------------|
| N3—C11—C12—N4                   | -46.3 (4)  | N5—C13—C14—N4                 | 46.9 (5)   |
| <b>Complex 3</b>                |            |                               |            |
| Ni1—S1—C1—C2                    | 180.0 (10) | O1—C21—N4—C23                 | 180.0 (2)  |
| Ni2—N3—C11—C12                  | -176.3 (2) | S2—C1—C2—C3                   | 180.0 (10) |
| Ni1—S1—C1—S2                    | 0          | O1—C21—N4—C22                 | 0.0 (10)   |
| C11 <sup>iii</sup> —C11—C12—C13 | 0.2 (3)    | S1—C1—C2—C4                   | 180.0 (10) |
| Ni1—S2—C1—C2                    | 180.0 (10) | O1—C21—N4A—C22A               | 0.0 (2)    |
| N3—C11—C12—C13                  | -179.7 (3) | S2—C1—C2—C4                   | 0.0 (10)   |
| Ni1—S2—C1—S1                    | 0          | O1—C21—N4A—C23A               | 180.0 (3)  |
| C11—C12—C13—C13 <sup>iii</sup>  | -0.2 (3)   | Ni2—N3—C11—C11 <sup>iii</sup> | 3.76 (17)  |
| S1—C1—C2—C3                     | 0.0 (10)   |                               |            |

Symmetry codes: For **3** (iii) x, -y-2, z

**Table S4:** Summary of hydrogen bond parameters in **1-3**.

| Crystal  | D H···A                    | d(D H) (Å) | d(H···A) (Å) | d(D···A) (Å) | <(D H···A) (°) | Symmetry operation    |
|----------|----------------------------|------------|--------------|--------------|----------------|-----------------------|
| <b>1</b> | N3 H3A···O1 <sup>i</sup>   | 0.88(3)    | 2.21(3)      | 2.979(3)     | 146(2)         | x-1/2, -y+3/2, z+1/2  |
|          | N3 H3B···S1 <sup>ii</sup>  | 0.84(3)    | 2.67(3)      | 3.419(2)     | 150(3)         | -x+1, -y+1, -z        |
|          | N5 H5A···S1 <sup>iii</sup> | 0.82(3)    | 2.93(3)      | 3.629(2)     | 145(3)         | -x+2, -y+1, -z        |
|          | N5 H5B···O1 <sup>iv</sup>  | 0.90(3)    | 2.18(3)      | 3.068(3)     | 168(3)         | -x+3/2, y-1/2, -z-1/2 |

|          |                            |         |         |          |        |                      |
|----------|----------------------------|---------|---------|----------|--------|----------------------|
|          | N6 H6A···O1 <sup>v</sup>   | 0.82(4) | 2.60(3) | 3.195(3) | 130(3) | X+1/2, -y+3/2, z+1/2 |
|          | N6 H6B···S1 <sup>iii</sup> | 0.92(4) | 2.56(4) | 3.445(2) | 161(3) | -x+2, -y+1, -z       |
| <b>2</b> | N3 H3A···N2 <sup>iii</sup> | 0.87(5) | 2.39(5) | 3.198(5) | 156(4) | -x+1/2, -y+3/2, -z   |
|          | N3 H3B···N1 <sup>iv</sup>  | 0.82(6) | 2.38(6) | 3.111(5) | 150(5) | -x+1, y+1, -z+1/2    |
|          | N4 H4···S1                 | 0.86(4) | 2.72(4) | 3.500(3) | 151(3) |                      |
| <b>3</b> | N3 H3A···O1                | 0.92(2) | 2.03(2) | 2.939(3) | 169(3) |                      |
|          | N3 H3B···N2 <sup>v</sup>   | 0.92(2) | 2.41(2) | 3.242(4) | 151(3) | x+1/2, y+1/2, z      |

---
